# Supplementary material for: Identification of a conserved virion-stabilizing network inside the interprotomer pocket of enteroviruses
Source: PubMed Central journal article supplement (PMC7910612; doi:10.1038/s42003-021-01779-x), 2021-02-26
Supplement: 42003_2021_1779_MOESM2_ESM.pdf [file 42003_2021_1779_MOESM2_ESM.pdf]

## **Supplementary Information**

### **Identification of a conserved virion-stabilizing network inside the interprotomer pocket of enteroviruses**

Justin W. Flatt, Aušra Domanska, Alma L. Seppälä, Sarah J. Butcher\*

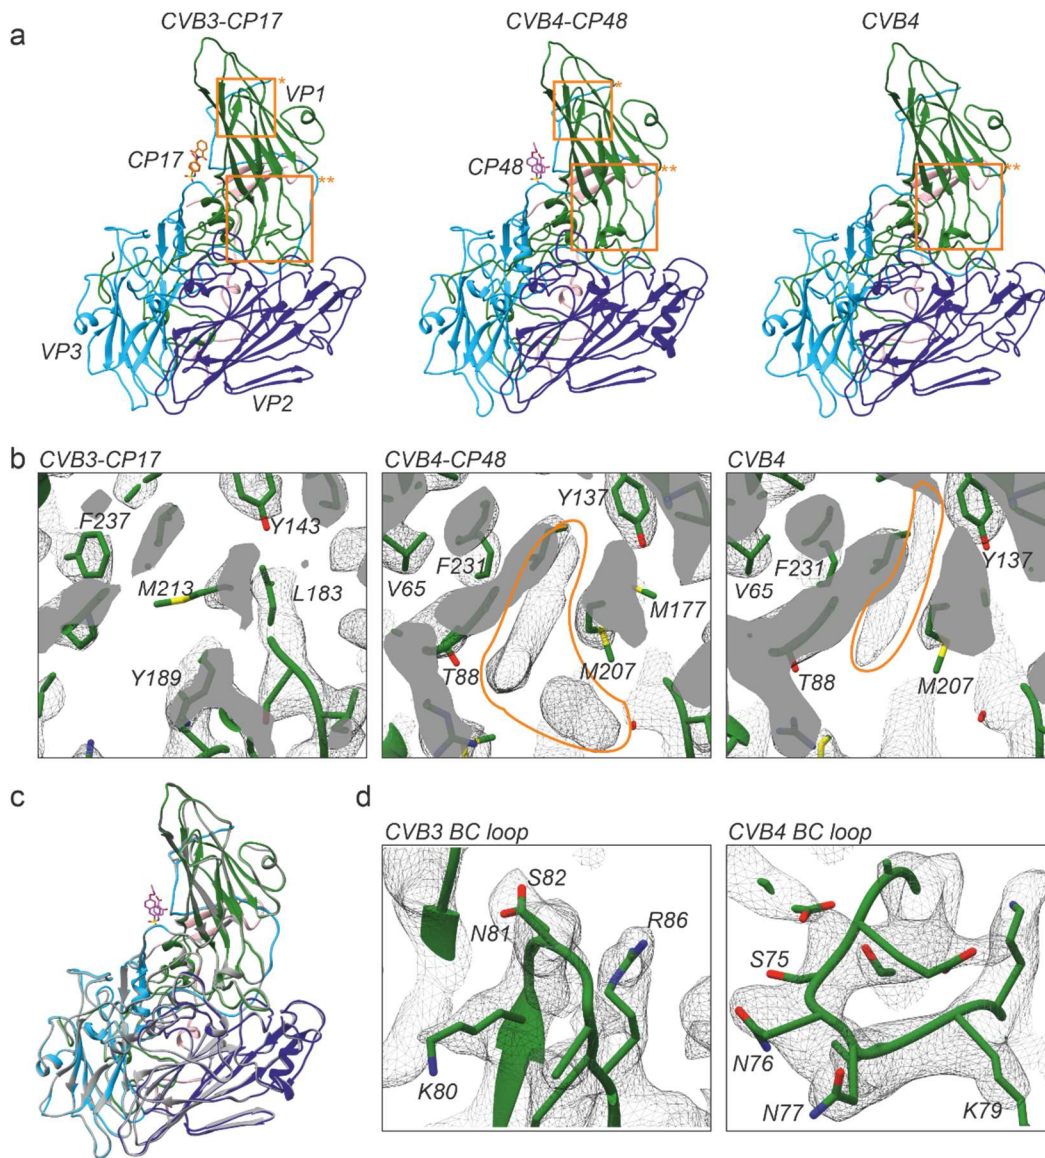

**Supplementary Figure 1.** Comparison between CVB3 and CVB4 structures. (a) Atomic models of CVB3-CP17, CVB4-CP48 and CVB4 alone. Boxed areas denoted with two asterisks are zoomed in (b) and with one asterisk in (d). (b) Density at the hydrophobic pocket of VP1 in CVB3-CP17, CVB4-CP48 and CVB4 alone. Notably, the hydrophobic pocket in CVB3 Nancy strain used in the study is empty. Density attributed to lipid factor in CP48-CVB4 and CVB4 reconstructions is encircled in orange. (c) Overlay of atomic models of CP48-CVB4 complex

(VP1, green; VP2, blue; VP3, light blue; VP4 light pink; CP48, magenta) with a control structure of CVB4 alone (gray); RMSD between the two structures is 0.45 Å. (d) Zoomed in view of BC loops in CVB3-CP17 and CVB4-CP48 reconstructions.

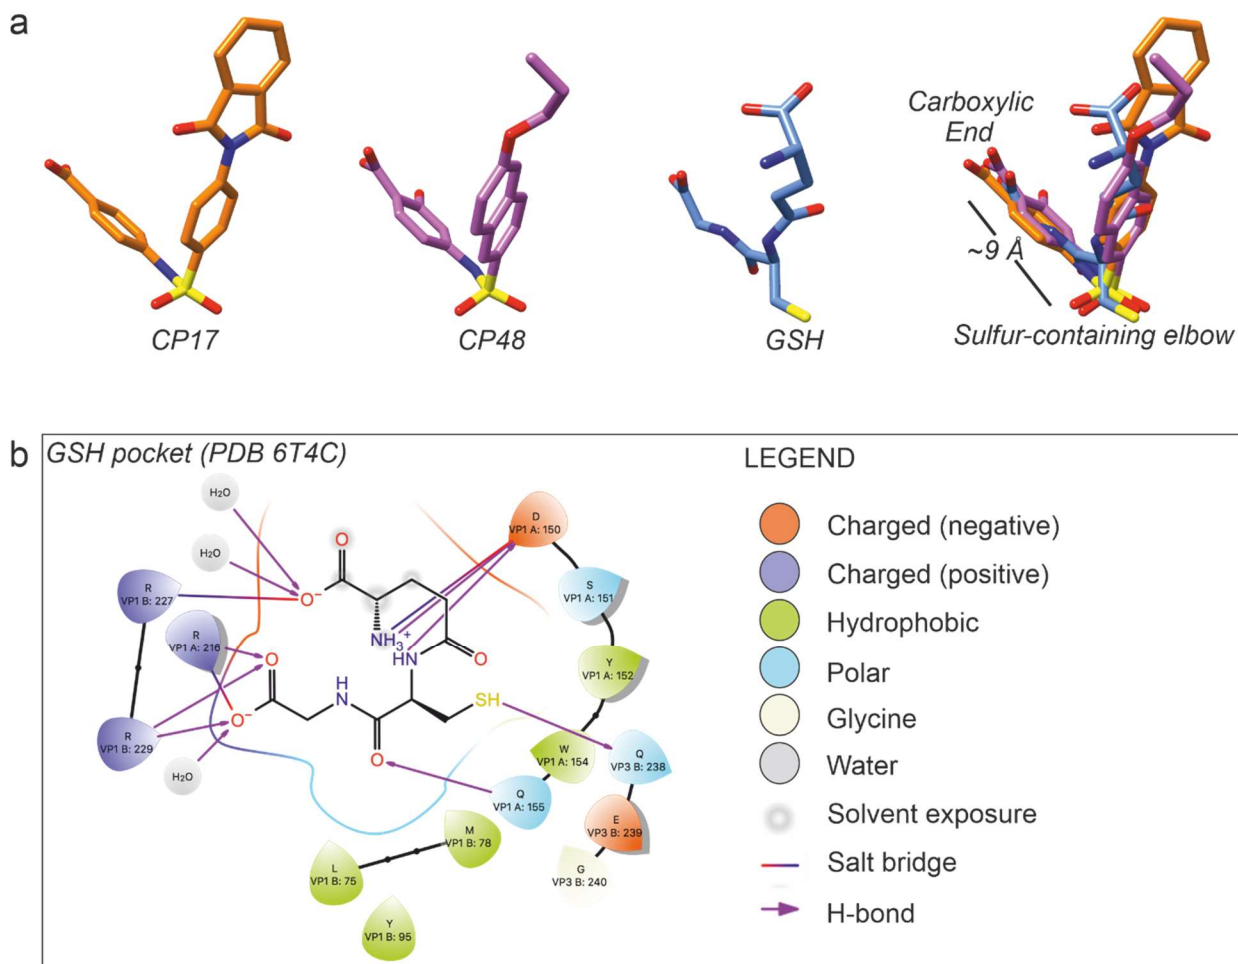

**Supplementary Figure 2. Glutathione (GSH) in comparison to CP17 and CP48. (a)**

Interprotomer-targeting molecules have similar features. (b) Interaction diagram of GSH with EVF3 viral proteins (PDB 6T4C) generated in Schrödinger Maestro software v12.02.

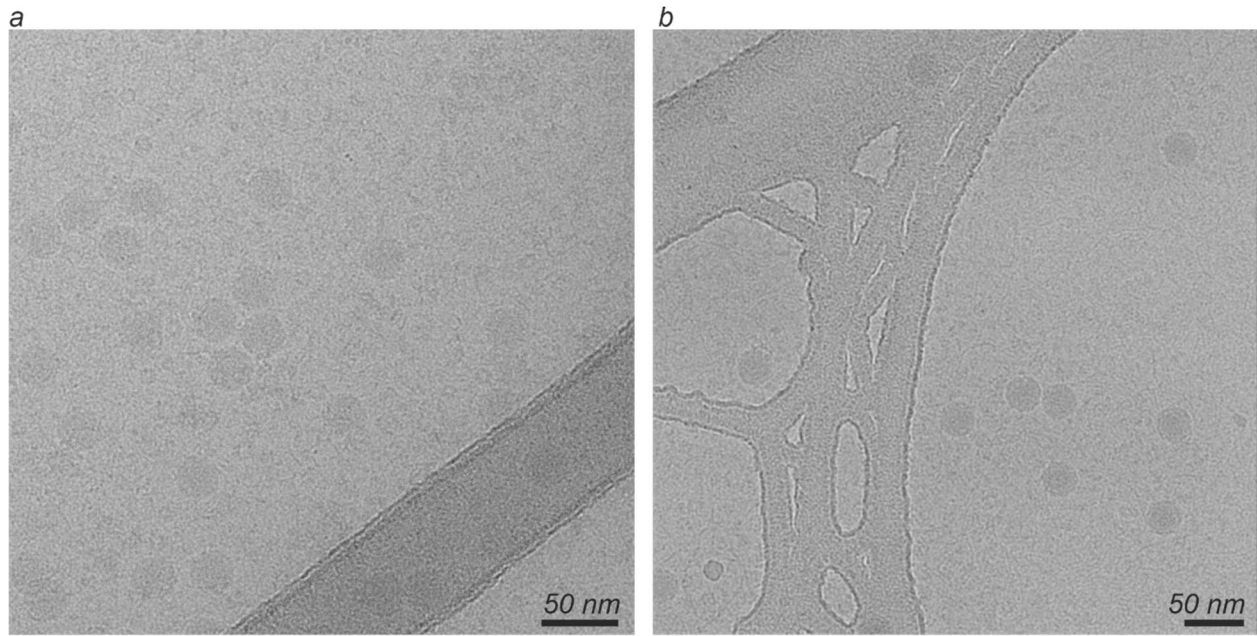

**Supplementary Figure 3.** Representative aligned micrographs of (a) CVB4-CP48 and (b) CVB4. Scale bar, 50 nm.

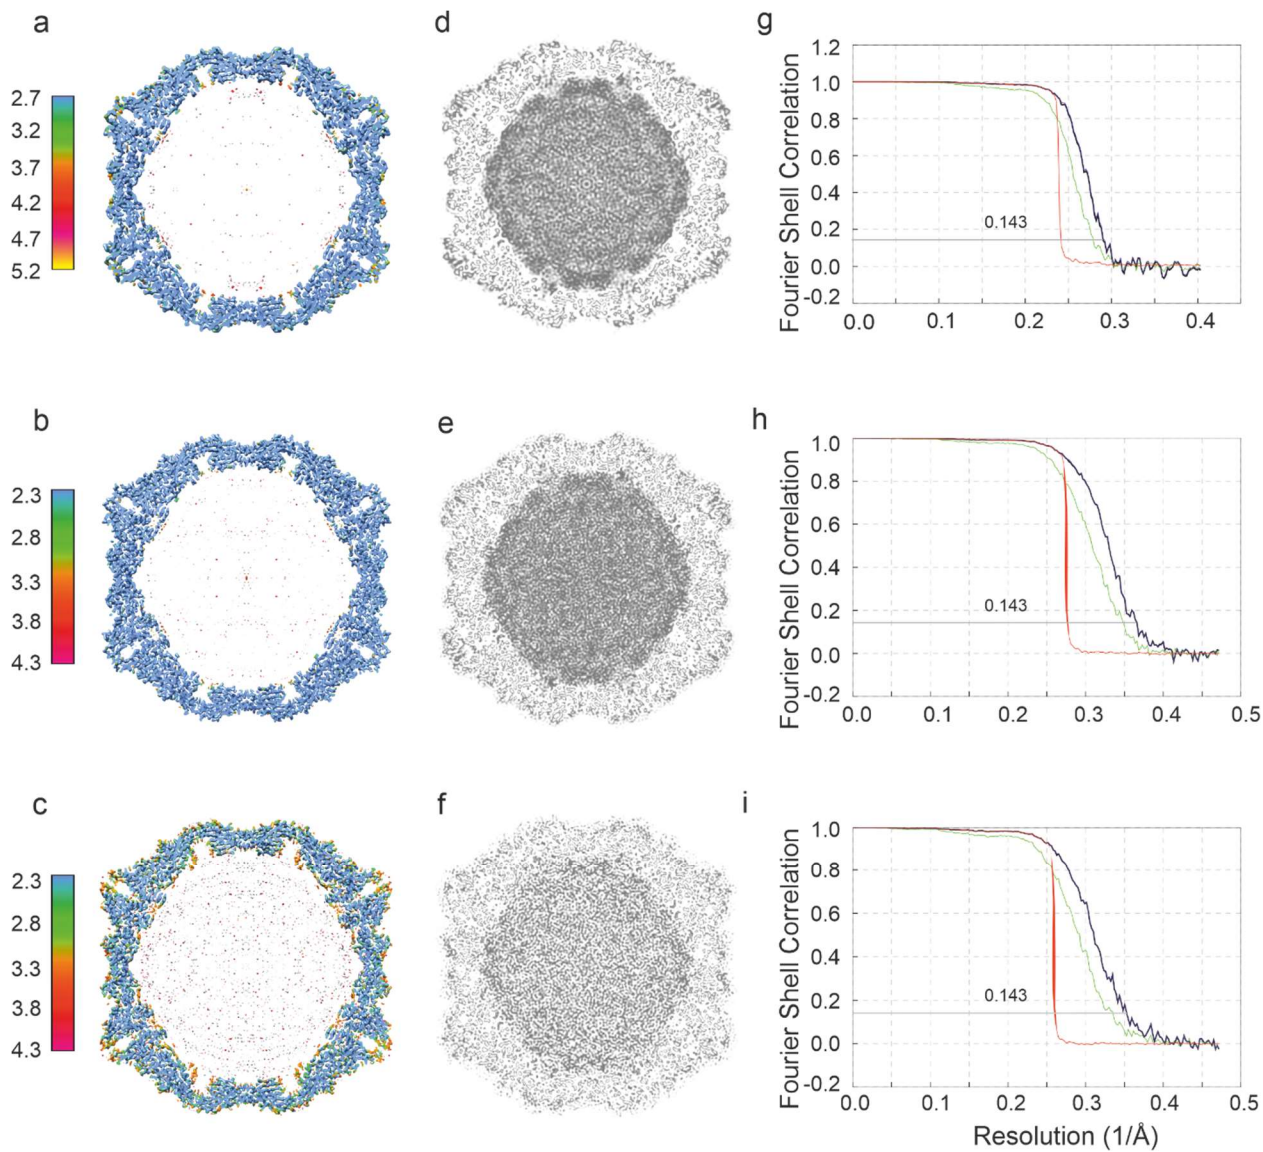

**Supplementary Figure 4:** (a-c) ResMap resolution slices with colour key showing resolution in Å, (d-f) central cross-sections of the reconstructions (g-i) FSC plots where the black curve is the plot for the corrected FSC, blue is for masked maps, red is for phase randomized masked maps and green is for unmasked maps, output from RELION 3. (a, d, g) CVB4, (b, e, h) CVB4-CP48, and (c,f,i) CVB3-CP17.

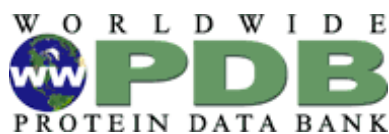

# Full wwPDB EM Map/Model Validation Report ⓘ

Jul 3, 2020 – 11:20 AM BST

PDB ID : 6ZCL  
EMDB ID : EMD-11166  
Title : Cocksackievirus B3 in complex with capsid binder compound 17  
Deposited on : 2020-06-11  
Resolution : 2.80 Å(reported)

This is a Full wwPDB EM Map/Model Validation Report.

This report is produced by the wwPDB biocuration pipeline after annotation of the structure.

We welcome your comments at [validation@mail.wwpdb.org](mailto:validation@mail.wwpdb.org)

A user guide is available at

<https://www.wwpdb.org/validation/2017/EMValidationReportHelp>

with specific help available everywhere you see the ⓘ symbol.

---

The following versions of software and data (see [references ⓘ](#)) were used in the production of this report:

EMDB validation analysis : 0.0.0.dev33  
Mogul : 1.8.5 (274361), CSD as541be (2020)  
MolProbity : 4.02b-467  
buster-report : 1.1.7 (2018)  
Percentile statistics : 20191225.v01 (using entries in the PDB archive December 25th 2019)  
Ideal geometry (proteins) : Engh & Huber (2001)  
Ideal geometry (DNA, RNA) : Parkinson et al. (1996)  
Validation Pipeline (wwPDB-VP) : 2.13.dev1



# 1 Overall quality at a glance i

The following experimental techniques were used to determine the structure:  
*ELECTRON MICROSCOPY*

The reported resolution of this entry is 2.80 Å.

Percentile scores (ranging between 0-100) for global validation metrics of the entry are shown in the following graphic. The table shows the number of entries on which the scores are based.

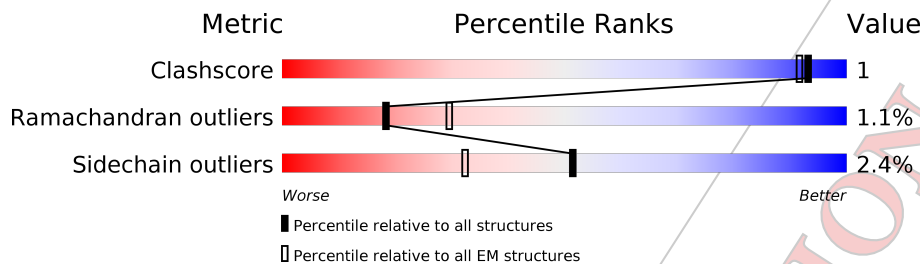

| Metric                | Whole archive (#Entries) | EM structures (#Entries) |
|-----------------------|--------------------------|--------------------------|
| Clashscore            | 158937                   | 4297                     |
| Ramachandran outliers | 154571                   | 4023                     |
| Sidechain outliers    | 154315                   | 3826                     |

The table below summarises the geometric issues observed across the polymeric chains and their fit to the map. The red, orange, yellow and green segments on the bar indicate the fraction of residues that contain outliers for  $\geq 3$ , 2, 1 and 0 types of geometric quality criteria respectively. A grey segment represents the fraction of residues that are not modelled. The numeric value for each fraction is indicated below the corresponding segment, with a dot representing fractions  $\leq 5\%$ . The upper red bar (where present) indicates the fraction of residues that have poor fit to the EM map (all atom inclusion  $< 40\%$ ). The numeric value is given above the bar.

| Mol | Chain | Length | Quality of chain |
|-----|-------|--------|------------------|
| 1   | A     | 269    |                  |
| 2   | B     | 252    |                  |
| 3   | C     | 237    |                  |
| 4   | D     | 68     |                  |

The following table lists non-polymeric compounds, carbohydrate monomers and non-standard residues in protein, DNA, RNA chains that are outliers for geometric or electron-density-fit criteria:

| Mol | Type | Chain | Res | Chirality | Geometry | Clashes | Electron density |
|-----|------|-------|-----|-----------|----------|---------|------------------|
| 6   | MYR  | D     | 101 | -         | -        | X       | -                |

## 2 Entry composition i

There are 6 unique types of molecules in this entry. The entry contains 6370 atoms, of which 0 are hydrogens and 0 are deuteriums.

In the tables below, the AltConf column contains the number of residues with at least one atom in alternate conformation and the Trace column contains the number of residues modelled with at most 2 atoms.

- Molecule 1 is a protein called capsid protein VP1.

| Mol | Chain | Residues | Atoms |      |     |     |   | AltConf | Trace |
|-----|-------|----------|-------|------|-----|-----|---|---------|-------|
|     |       |          | Total | C    | N   | O   | S |         |       |
| 1   | A     | 269      | 2133  | 1346 | 376 | 403 | 8 | 0       | 0     |

- Molecule 2 is a protein called capsid protein VP2.

| Mol | Chain | Residues | Atoms |      |     |     |    | AltConf | Trace |
|-----|-------|----------|-------|------|-----|-----|----|---------|-------|
|     |       |          | Total | C    | N   | O   | S  |         |       |
| 2   | B     | 252      | 1935  | 1222 | 327 | 370 | 16 | 0       | 0     |

- Molecule 3 is a protein called capsid protein VP3.

| Mol | Chain | Residues | Atoms |      |     |     |    | AltConf | Trace |
|-----|-------|----------|-------|------|-----|-----|----|---------|-------|
|     |       |          | Total | C    | N   | O   | S  |         |       |
| 3   | C     | 237      | 1828  | 1170 | 293 | 348 | 17 | 0       | 0     |

- Molecule 4 is a protein called capsid protein VP4.

| Mol | Chain | Residues | Atoms |     |    |    |   | AltConf | Trace |
|-----|-------|----------|-------|-----|----|----|---|---------|-------|
|     |       |          | Total | C   | N  | O  | S |         |       |
| 4   | D     | 55       | 429   | 267 | 74 | 87 | 1 | 0       | 0     |

- Molecule 5 is 4-[[4-[1,3-bis(oxidanylidene)isoindol-2-yl]phenyl]sulfonylamino]benzoic acid (three-letter code: FHK) (formula: C<sub>21</sub>H<sub>14</sub>N<sub>2</sub>O<sub>6</sub>S) (labeled as "Ligand of Interest" by author).



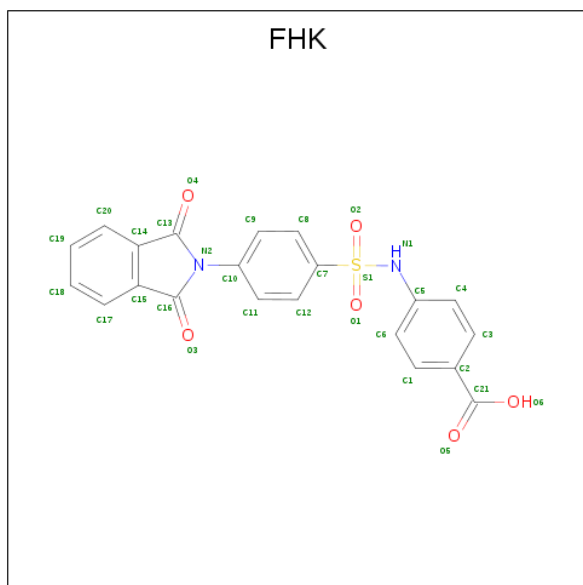

| Mol | Chain | Residues | Atoms |    |   |   |   | AltConf |
|-----|-------|----------|-------|----|---|---|---|---------|
|     |       |          | Total | C  | N | O | S |         |
| 5   | C     | 1        | 30    | 21 | 2 | 6 | 1 | 0       |

- Molecule 6 is MYRISTIC ACID (three-letter code: MYR) (formula:  $C_{14}H_{28}O_2$ ).

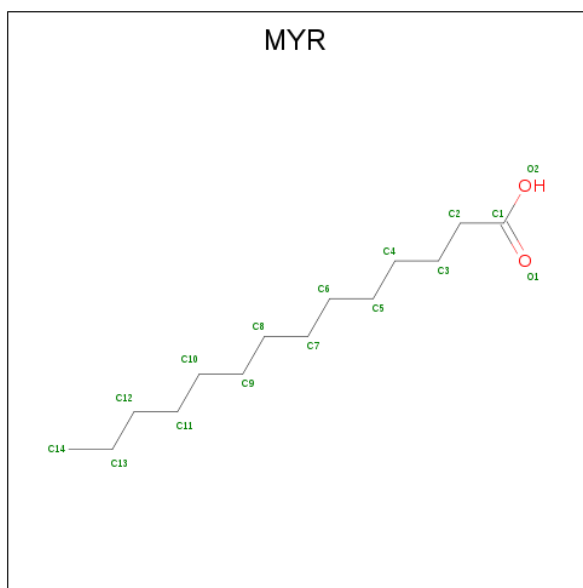

| Mol | Chain | Residues | Atoms |    |   | AltConf |
|-----|-------|----------|-------|----|---|---------|
|     |       |          | Total | C  | O |         |
| 6   | D     | 1        | 15    | 14 | 1 | 0       |

### 3 Residue-property plots [\(i\)](#)

These plots are drawn for all protein, RNA, DNA and oligosaccharide chains in the entry. The first graphic for a chain summarises the proportions of the various outlier classes displayed in the second graphic. The second graphic shows the sequence view annotated by issues in geometry and atom inclusion in map density. Residues are color-coded according to the number of geometric quality criteria for which they contain at least one outlier: green = 0, yellow = 1, orange = 2 and red = 3 or more. A red diamond above a residue indicates a poor fit to the EM map for this residue (all atom inclusion < 40%). Stretches of 2 or more consecutive residues without any outlier are shown as a green connector. Residues present in the sample, but not in the model, are shown in grey.

- Molecule 1: capsid protein VP1

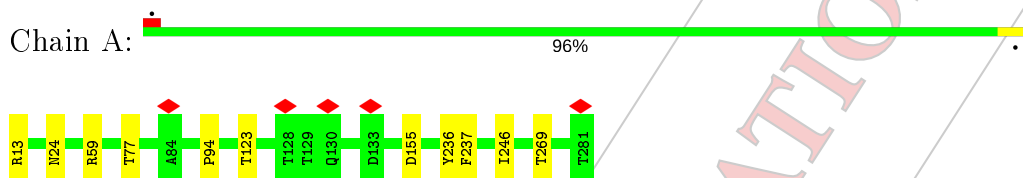

- Molecule 2: capsid protein VP2

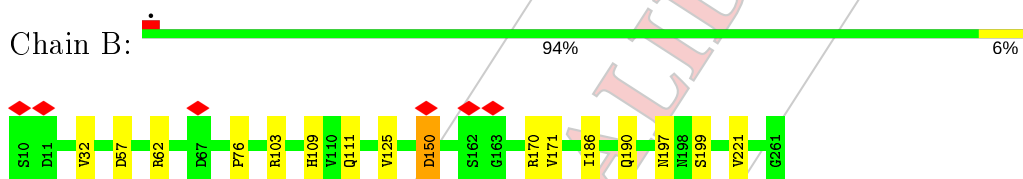

- Molecule 3: capsid protein VP3

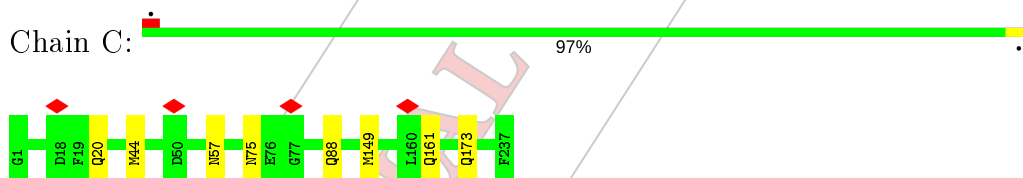

- Molecule 4: capsid protein VP4

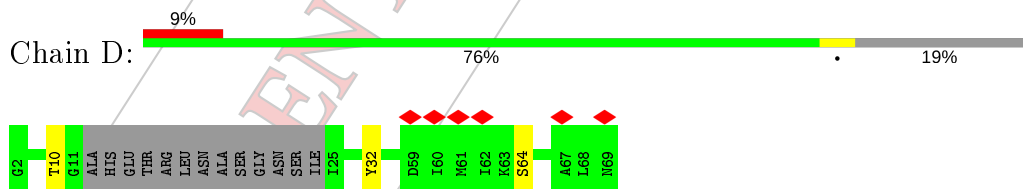

## 4 Experimental information i

| Property                             | Value                                   | Source    |
|--------------------------------------|-----------------------------------------|-----------|
| EM reconstruction method             | SINGLE PARTICLE                         | Depositor |
| Imposed symmetry                     | POINT, Not provided                     | Depositor |
| Number of particles used             | 18626                                   | Depositor |
| Resolution determination method      | FSC 0.143 CUT-OFF                       | Depositor |
| CTF correction method                | PHASE FLIPPING AND AMPLITUDE CORRECTION | Depositor |
| Microscope                           | FEI TITAN KRIOS                         | Depositor |
| Voltage (kV)                         | 300                                     | Depositor |
| Electron dose ( $e^-/\text{\AA}^2$ ) | 47                                      | Depositor |
| Minimum defocus (nm)                 | Not provided                            | Depositor |
| Maximum defocus (nm)                 | Not provided                            | Depositor |
| Magnification                        | Not provided                            | Depositor |
| Image detector                       | GATAN K2 SUMMIT (4k x 4k)               | Depositor |
| Maximum map value                    | 0.125                                   | Depositor |
| Minimum map value                    | -0.070                                  | Depositor |
| Average map value                    | 0.001                                   | Depositor |
| Map value standard deviation         | 0.007                                   | Depositor |
| Recommended contour level            | 0.019                                   | Depositor |
| Map size (Å)                         | 445.19998, 445.19998, 445.19998         | Depositor |
| Map dimensions                       | 420, 420, 420                           | Depositor |
| Map angles (°)                       | 90.0, 90.0, 90.0                        | Depositor |
| Pixel spacing (Å)                    | 1.06, 1.06, 1.06                        | Depositor |

## 5 Model quality (i)

### 5.1 Standard geometry (i)

Bond lengths and bond angles in the following residue types are not validated in this section: MYR, FHK

The Z score for a bond length (or angle) is the number of standard deviations the observed value is removed from the expected value. A bond length (or angle) with  $|Z| > 5$  is considered an outlier worth inspection. RMSZ is the root-mean-square of all Z scores of the bond lengths (or angles).

| Mol | Chain | Bond lengths |         | Bond angles |               |
|-----|-------|--------------|---------|-------------|---------------|
|     |       | RMSZ         | # Z  >5 | RMSZ        | # Z  >5       |
| 1   | A     | 0.87         | 0/2190  | 1.02        | 2/2986 (0.1%) |
| 2   | B     | 0.85         | 0/1985  | 1.04        | 1/2716 (0.0%) |
| 3   | C     | 0.86         | 0/1879  | 0.99        | 1/2560 (0.0%) |
| 4   | D     | 0.86         | 0/436   | 0.98        | 0/587         |
| All | All   | 0.86         | 0/6490  | 1.01        | 4/8849 (0.0%) |

Chiral center outliers are detected by calculating the chiral volume of a chiral center and verifying if the center is modelled as a planar moiety or with the opposite hand. A planarity outlier is detected by checking planarity of atoms in a peptide group, atoms in a mainchain group or atoms of a sidechain that are expected to be planar.

| Mol | Chain | #Chirality outliers | #Planarity outliers |
|-----|-------|---------------------|---------------------|
| 1   | A     | 0                   | 2                   |
| 2   | B     | 0                   | 1                   |
| All | All   | 0                   | 3                   |

There are no bond length outliers.

All (4) bond angle outliers are listed below:

| Mol | Chain | Res | Type | Atoms     | Z     | Observed( $^{\circ}$ ) | Ideal( $^{\circ}$ ) |
|-----|-------|-----|------|-----------|-------|------------------------|---------------------|
| 3   | C     | 161 | GLN  | N-CA-CB   | 5.42  | 120.35                 | 110.60              |
| 1   | A     | 237 | PHE  | CB-CG-CD1 | 5.30  | 124.51                 | 120.80              |
| 2   | B     | 150 | ASP  | N-CA-CB   | 5.26  | 120.06                 | 110.60              |
| 1   | A     | 237 | PHE  | CB-CG-CD2 | -5.21 | 117.15                 | 120.80              |

There are no chirality outliers.

All (3) planarity outliers are listed below:

| Mol | Chain | Res | Type | Group     |
|-----|-------|-----|------|-----------|
| 1   | A     | 236 | TYR  | Sidechain |
| 1   | A     | 59  | ARG  | Sidechain |
| 2   | B     | 103 | ARG  | Sidechain |

## 5.2 Too-close contacts [i](#)

In the following table, the Non-H and H(model) columns list the number of non-hydrogen atoms and hydrogen atoms in the chain respectively. The H(added) column lists the number of hydrogen atoms added and optimized by MolProbity. The Clashes column lists the number of clashes within the asymmetric unit, whereas Symm-Clashes lists symmetry related clashes.

| Mol | Chain | Non-H | H(model) | H(added) | Clashes | Symm-Clashes |
|-----|-------|-------|----------|----------|---------|--------------|
| 1   | A     | 2133  | 0        | 2070     | 3       | 0            |
| 2   | B     | 1935  | 0        | 1871     | 2       | 0            |
| 3   | C     | 1828  | 0        | 1762     | 1       | 0            |
| 4   | D     | 429   | 0        | 415      | 11      | 0            |
| 5   | C     | 30    | 0        | 0        | 0       | 0            |
| 6   | D     | 15    | 0        | 27       | 10      | 0            |
| All | All   | 6370  | 0        | 6145     | 16      | 0            |

The all-atom clashscore is defined as the number of clashes found per 1000 atoms (including hydrogen atoms). The all-atom clashscore for this structure is 1.

All (16) close contacts within the same asymmetric unit are listed below, sorted by their clash magnitude.

| Atom-1          | Atom-2           | Interatomic distance (Å) | Clash overlap (Å) |
|-----------------|------------------|--------------------------|-------------------|
| 4:D:32:TYR:HD1  | 6:D:101:MYR:C13  | 1.34                     | 1.39              |
| 4:D:32:TYR:CD1  | 6:D:101:MYR:C13  | 2.19                     | 1.24              |
| 4:D:32:TYR:CD1  | 6:D:101:MYR:H131 | 1.75                     | 1.21              |
| 4:D:32:TYR:CD1  | 6:D:101:MYR:H132 | 1.83                     | 1.14              |
| 4:D:32:TYR:HD1  | 6:D:101:MYR:H131 | 0.90                     | 1.04              |
| 1:A:269:THR:CA  | 1:A:269:THR:CG2  | 2.51                     | 0.88              |
| 1:A:269:THR:CG2 | 1:A:269:THR:OG1  | 2.42                     | 0.67              |
| 1:A:269:THR:CA  | 1:A:269:THR:OG1  | 2.46                     | 0.64              |
| 4:D:32:TYR:HE1  | 6:D:101:MYR:C11  | 2.16                     | 0.58              |
| 4:D:32:TYR:HE1  | 6:D:101:MYR:H112 | 1.74                     | 0.51              |
| 4:D:32:TYR:CE1  | 6:D:101:MYR:H112 | 2.48                     | 0.49              |
| 4:D:32:TYR:CE1  | 6:D:101:MYR:C11  | 2.96                     | 0.49              |
| 4:D:32:TYR:CE1  | 6:D:101:MYR:C13  | 2.90                     | 0.47              |
| 3:C:20:GLN:HE22 | 4:D:32:TYR:H     | 1.64                     | 0.44              |
| 2:B:109:HIS:CE1 | 2:B:199:SER:HB3  | 2.57                     | 0.40              |

*Continued on next page...*

Continued from previous page...

| Atom-1          | Atom-2           | Interatomic distance (Å) | Clash overlap (Å) |
|-----------------|------------------|--------------------------|-------------------|
| 2:B:32:VAL:HG23 | 2:B:190:GLN:HE21 | 1.86                     | 0.40              |

There are no symmetry-related clashes.

## 5.3 Torsion angles [i](#)

### 5.3.1 Protein backbone [i](#)

In the following table, the Percentiles column shows the percent Ramachandran outliers of the chain as a percentile score with respect to all PDB entries followed by that with respect to all EM entries.

The Analysed column shows the number of residues for which the backbone conformation was analysed, and the total number of residues.

| Mol | Chain | Analysed      | Favoured  | Allowed | Outliers | Percentiles |    |
|-----|-------|---------------|-----------|---------|----------|-------------|----|
| 1   | A     | 267/269 (99%) | 251 (94%) | 13 (5%) | 3 (1%)   | 14          | 41 |
| 2   | B     | 250/252 (99%) | 234 (94%) | 13 (5%) | 3 (1%)   | 13          | 39 |
| 3   | C     | 235/237 (99%) | 221 (94%) | 12 (5%) | 2 (1%)   | 17          | 46 |
| 4   | D     | 51/68 (75%)   | 48 (94%)  | 2 (4%)  | 1 (2%)   | 7           | 24 |
| All | All   | 803/826 (97%) | 754 (94%) | 40 (5%) | 9 (1%)   | 18          | 41 |

All (9) Ramachandran outliers are listed below:

| Mol | Chain | Res | Type |
|-----|-------|-----|------|
| 2   | B     | 150 | ASP  |
| 3   | C     | 57  | ASN  |
| 1   | A     | 155 | ASP  |
| 2   | B     | 57  | ASP  |
| 2   | B     | 76  | PRO  |
| 1   | A     | 246 | ILE  |
| 4   | D     | 64  | SER  |
| 1   | A     | 94  | PRO  |
| 3   | C     | 88  | GLN  |

### 5.3.2 Protein sidechains [i](#)

In the following table, the Percentiles column shows the percent sidechain outliers of the chain as a percentile score with respect to all PDB entries followed by that with respect to all EM



entries.

The Analysed column shows the number of residues for which the sidechain conformation was analysed, and the total number of residues.

| Mol | Chain | Analysed       | Rotameric | Outliers | Percentiles |    |
|-----|-------|----------------|-----------|----------|-------------|----|
| 1   | A     | 235/236 (100%) | 231 (98%) | 4 (2%)   | 60          | 87 |
| 2   | B     | 214/214 (100%) | 206 (96%) | 8 (4%)   | 34          | 68 |
| 3   | C     | 205/205 (100%) | 201 (98%) | 4 (2%)   | 55          | 84 |
| 4   | D     | 47/57 (82%)    | 46 (98%)  | 1 (2%)   | 53          | 84 |
| All | All   | 701/712 (98%)  | 684 (98%) | 17 (2%)  | 51          | 81 |

All (17) residues with a non-rotameric sidechain are listed below:

| Mol | Chain | Res | Type |
|-----|-------|-----|------|
| 1   | A     | 13  | ARG  |
| 1   | A     | 24  | ASN  |
| 1   | A     | 77  | THR  |
| 1   | A     | 123 | THR  |
| 2   | B     | 62  | ARG  |
| 2   | B     | 111 | GLN  |
| 2   | B     | 125 | VAL  |
| 2   | B     | 170 | ARG  |
| 2   | B     | 171 | VAL  |
| 2   | B     | 186 | ILE  |
| 2   | B     | 197 | ASN  |
| 2   | B     | 221 | VAL  |
| 3   | C     | 44  | MET  |
| 3   | C     | 75  | ASN  |
| 3   | C     | 149 | MET  |
| 3   | C     | 173 | GLN  |
| 4   | D     | 10  | THR  |

Some sidechains can be flipped to improve hydrogen bonding and reduce clashes. All (9) such sidechains are listed below:

| Mol | Chain | Res | Type |
|-----|-------|-----|------|
| 1   | A     | 24  | ASN  |
| 1   | A     | 41  | GLN  |
| 1   | A     | 164 | ASN  |
| 1   | A     | 211 | ASN  |
| 1   | A     | 220 | HIS  |
| 2   | B     | 70  | GLN  |

*Continued on next page...*

Continued from previous page...

| Mol | Chain | Res | Type |
|-----|-------|-----|------|
| 2   | B     | 109 | HIS  |
| 2   | B     | 197 | ASN  |
| 3   | C     | 20  | GLN  |

### 5.3.3 RNA [i](#)

There are no RNA molecules in this entry.

### 5.4 Non-standard residues in protein, DNA, RNA chains [i](#)

There are no non-standard protein/DNA/RNA residues in this entry.

### 5.5 Carbohydrates [i](#)

There are no carbohydrates in this entry.

### 5.6 Ligand geometry [i](#)

2 ligands are modelled in this entry.

In the following table, the Counts columns list the number of bonds (or angles) for which Mogul statistics could be retrieved, the number of bonds (or angles) that are observed in the model and the number of bonds (or angles) that are defined in the Chemical Component Dictionary. The Link column lists molecule types, if any, to which the group is linked. The Z score for a bond length (or angle) is the number of standard deviations the observed value is removed from the expected value. A bond length (or angle) with  $|Z| > 2$  is considered an outlier worth inspection. RMSZ is the root-mean-square of all Z scores of the bond lengths (or angles).

| Mol | Type | Chain | Res | Link | Bond lengths |      |          | Bond angles |      |          |
|-----|------|-------|-----|------|--------------|------|----------|-------------|------|----------|
|     |      |       |     |      | Counts       | RMSZ | # Z  > 2 | Counts      | RMSZ | # Z  > 2 |
| 5   | FHK  | C     | 301 | -    | 31,33,33     | 1.45 | 3 (9%)   | 46,49,49    | 1.66 | 7 (15%)  |
| 6   | MYR  | D     | 101 | 4    | 14,14,15     | 0.28 | 0        | 13,13,15    | 1.14 | 2 (15%)  |

In the following table, the Chirals column lists the number of chiral outliers, the number of chiral centers analysed, the number of these observed in the model and the number defined in the Chemical Component Dictionary. Similar counts are reported in the Torsion and Rings columns. '-' means no outliers of that kind were identified.

| Mol | Type | Chain | Res | Link | Chirals | Torsions   | Rings   |
|-----|------|-------|-----|------|---------|------------|---------|
| 5   | FHK  | C     | 301 | -    | -       | 5/15/35/35 | 0/4/4/4 |

Continued on next page...

Continued from previous page...

| Mol | Type | Chain | Res | Link | Chirals | Torsions   | Rings |
|-----|------|-------|-----|------|---------|------------|-------|
| 6   | MYR  | D     | 101 | 4    | -       | 3/11/12/13 | -     |

All (3) bond length outliers are listed below:

| Mol | Chain | Res | Type | Atoms   | Z     | Observed(Å) | Ideal(Å) |
|-----|-------|-----|------|---------|-------|-------------|----------|
| 5   | C     | 301 | FHK  | S1-N1   | 5.88  | 1.73        | 1.63     |
| 5   | C     | 301 | FHK  | C14-C13 | -2.23 | 1.45        | 1.48     |
| 5   | C     | 301 | FHK  | C15-C16 | -2.12 | 1.45        | 1.48     |

All (9) bond angle outliers are listed below:

| Mol | Chain | Res | Type | Atoms       | Z     | Observed(°) | Ideal(°) |
|-----|-------|-----|------|-------------|-------|-------------|----------|
| 5   | C     | 301 | FHK  | O3-C16-N2   | 4.62  | 131.60      | 125.19   |
| 5   | C     | 301 | FHK  | O4-C13-N2   | 4.61  | 131.58      | 125.19   |
| 5   | C     | 301 | FHK  | O3-C16-C15  | -3.66 | 121.56      | 128.68   |
| 5   | C     | 301 | FHK  | O4-C13-C14  | -3.50 | 121.87      | 128.68   |
| 5   | C     | 301 | FHK  | C7-S1-N1    | -3.45 | 102.50      | 106.83   |
| 5   | C     | 301 | FHK  | C3-C2-C21   | -3.18 | 116.09      | 120.37   |
| 6   | D     | 101 | MYR  | C7-C6-C5    | -2.61 | 101.17      | 114.42   |
| 5   | C     | 301 | FHK  | C1-C2-C21   | 2.36  | 123.54      | 120.37   |
| 6   | D     | 101 | MYR  | C12-C11-C10 | -2.28 | 102.85      | 114.42   |

There are no chirality outliers.

All (8) torsion outliers are listed below:

| Mol | Chain | Res | Type | Atoms          |
|-----|-------|-----|------|----------------|
| 6   | D     | 101 | MYR  | C1-C2-C3-C4    |
| 5   | C     | 301 | FHK  | C9-C10-N2-C13  |
| 5   | C     | 301 | FHK  | C11-C10-N2-C13 |
| 5   | C     | 301 | FHK  | C9-C10-N2-C16  |
| 5   | C     | 301 | FHK  | C11-C10-N2-C16 |
| 6   | D     | 101 | MYR  | C7-C8-C9-C10   |
| 6   | D     | 101 | MYR  | C6-C7-C8-C9    |
| 5   | C     | 301 | FHK  | C12-C7-S1-O2   |

There are no ring outliers.

1 monomer is involved in 10 short contacts:

| Mol | Chain | Res | Type | Clashes | Symm-Clashes |
|-----|-------|-----|------|---------|--------------|
| 6   | D     | 101 | MYR  | 10      | 0            |

The following is a two-dimensional graphical depiction of Mogul quality analysis of bond lengths, bond angles, torsion angles, and ring geometry for all instances of the Ligand of Interest. In addition, ligands with molecular weight > 250 and outliers as shown on the validation Tables will also be included. For torsion angles, if less than 5% of the Mogul distribution of torsion angles is within 10 degrees of the torsion angle in question, then that torsion angle is considered an outlier. Any bond that is central to one or more torsion angles identified as an outlier by Mogul will be highlighted in the graph. For rings, the root-mean-square deviation (RMSD) between the ring in question and similar rings identified by Mogul is calculated over all ring torsion angles. If the average RMSD is greater than 60 degrees and the minimal RMSD between the ring in question and any Mogul-identified rings is also greater than 60 degrees, then that ring is considered an outlier. The outliers are highlighted in purple. The color gray indicates Mogul did not find sufficient equivalents in the CSD to analyse the geometry.

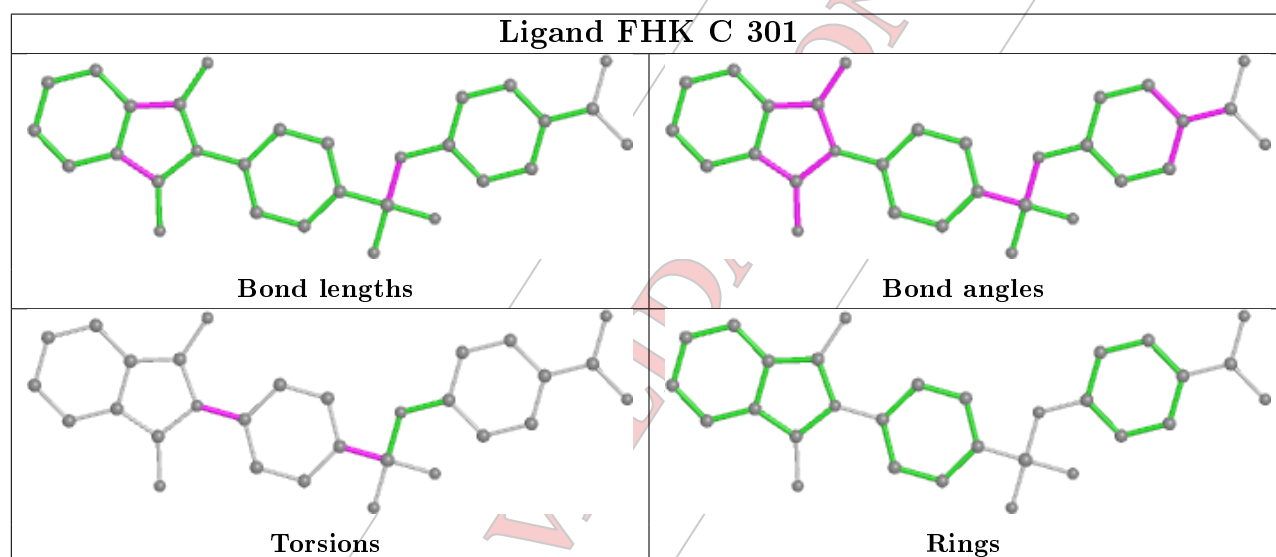

### 5.7 Other polymers [i](#)

There are no such residues in this entry.

### 5.8 Polymer linkage issues [i](#)

There are no chain breaks in this entry.

## 6 Map visualisation [i](#)

This section contains visualisations of the EMDB entry EMD-11166. These are intended to permit visual inspection of the internal detail of the map and identification of artifacts.

### 6.1 Orthogonal projections [i](#)

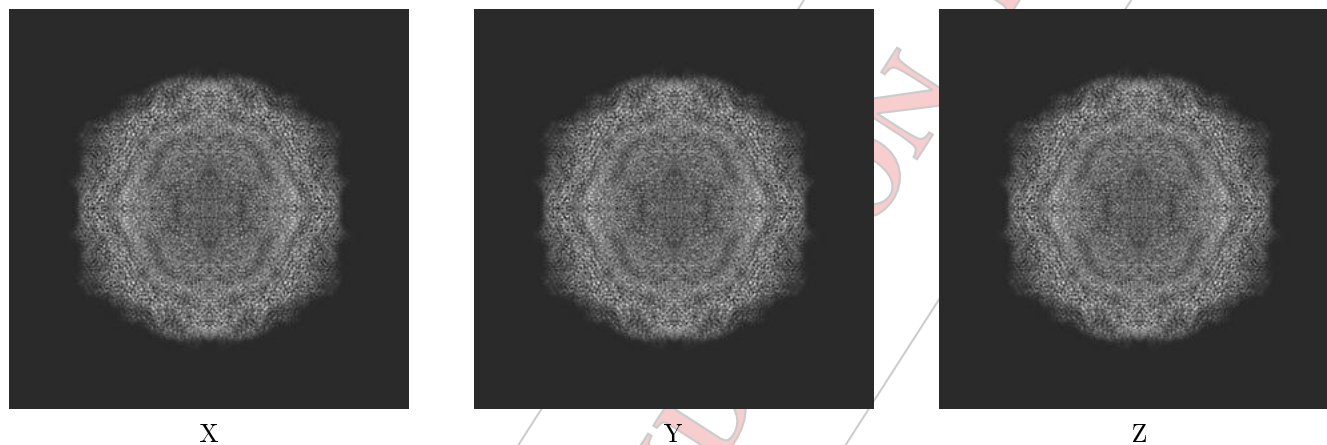

The images above show the map projected in three orthogonal projections, in greyscale.

### 6.2 Central slices [i](#)

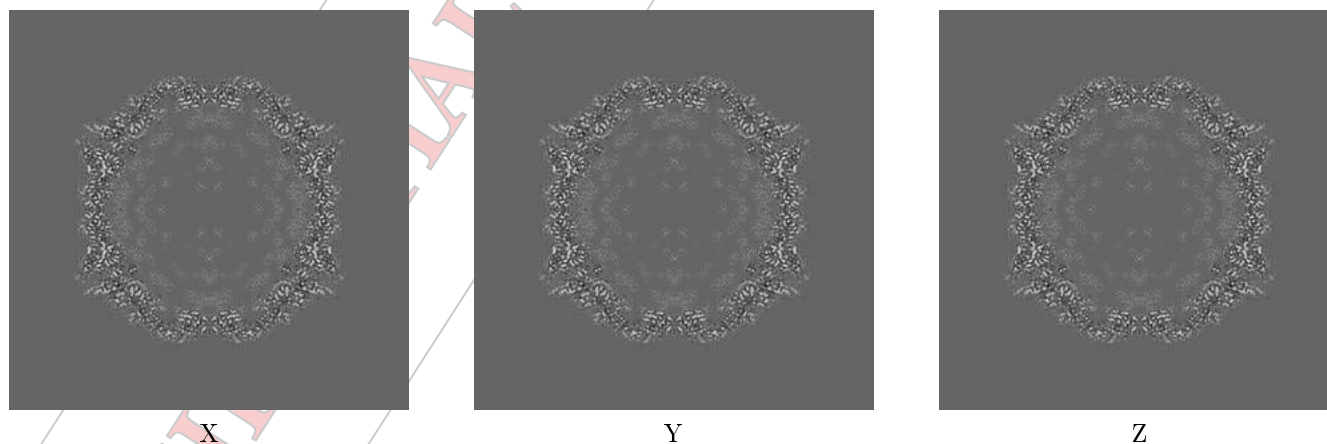

The images above show central slices of the map in three orthogonal directions, in greyscale.

### 6.3 Largest variance slices [i](#)

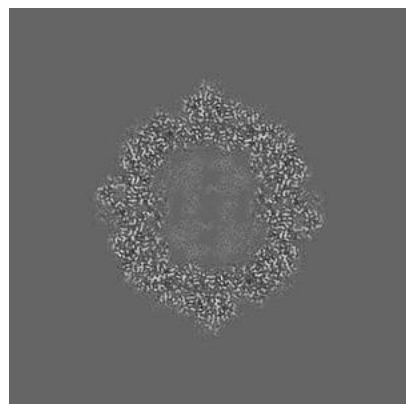

X Index: 125

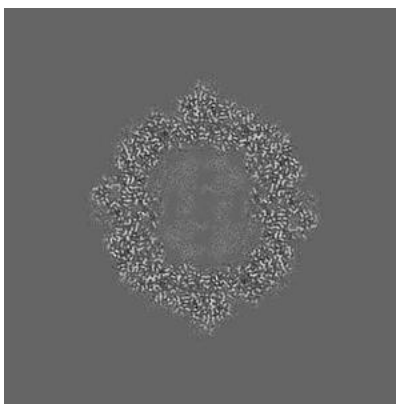

Y Index: 125

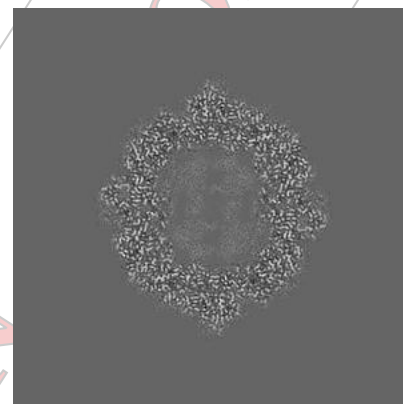

Z Index: 125

The images above show the highest variance slices of the map in three orthogonal directions, in greyscale.

### 6.4 Orthogonal surface views [i](#)

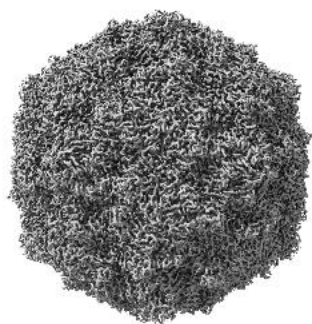

X

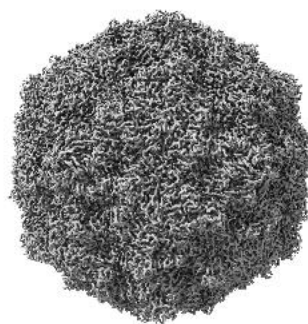

Y

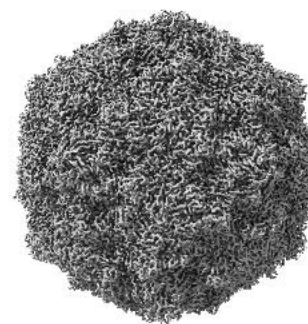

Z

The images above show the 3D surface view of the map at the recommended contour level 0.019. This in conjunction with the slice images can indicate whether an appropriate contour level has been selected.

### 6.5 Mask visualisation [i](#)

This section was not generated. No masks were provided.



## 7 Map analysis [i](#)

This section contains the results of statistical analysis of the map.

### 7.1 Map-value distribution [i](#)

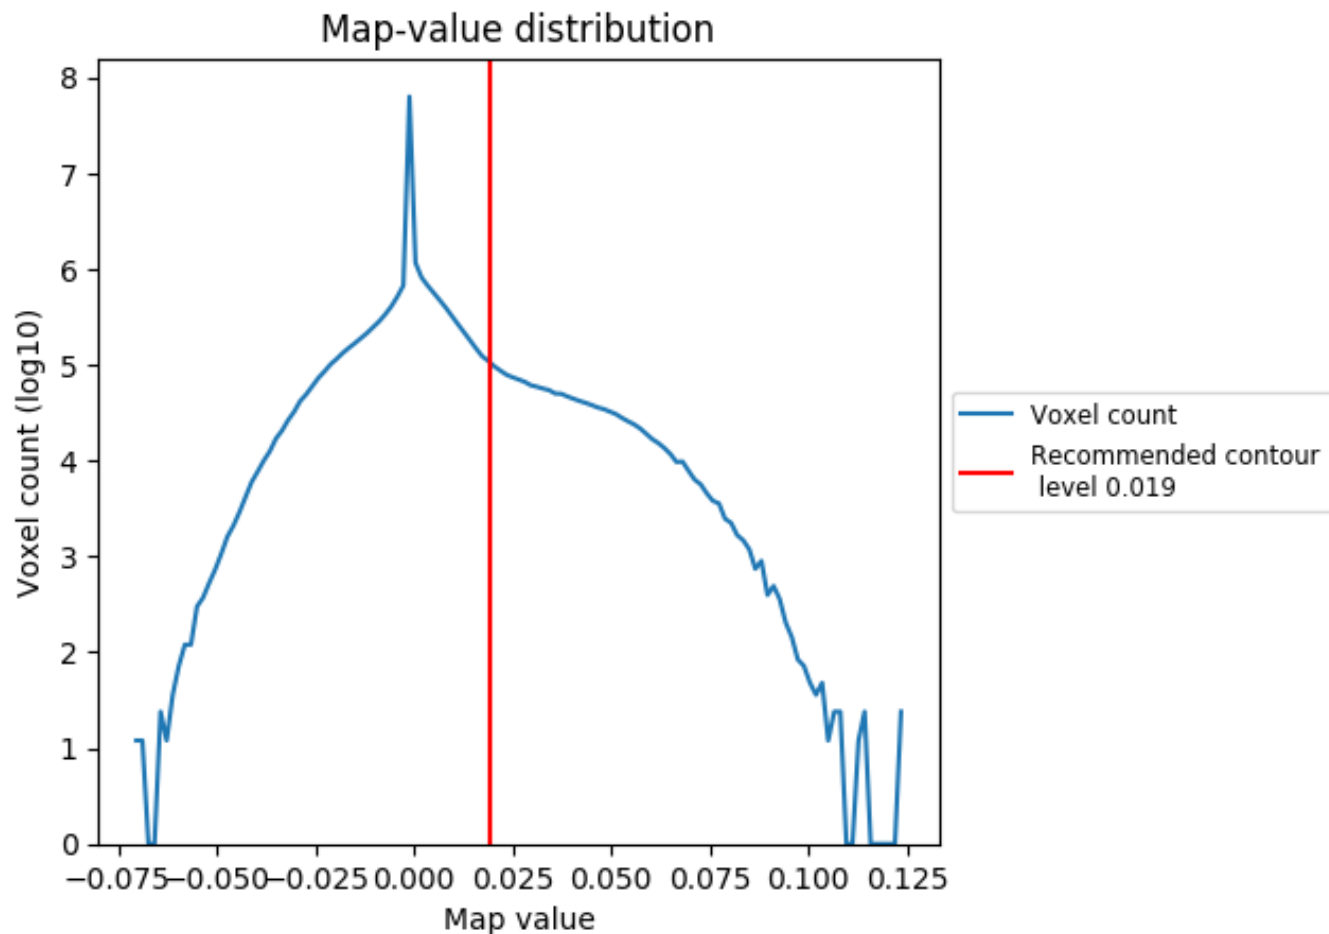

The map-value distribution is plotted in 128 intervals along the x-axis. The y-axis is logarithmic. A spike in this graph at zero usually indicates that the volume has been masked.

## 7.2 Volume estimate [i](#)

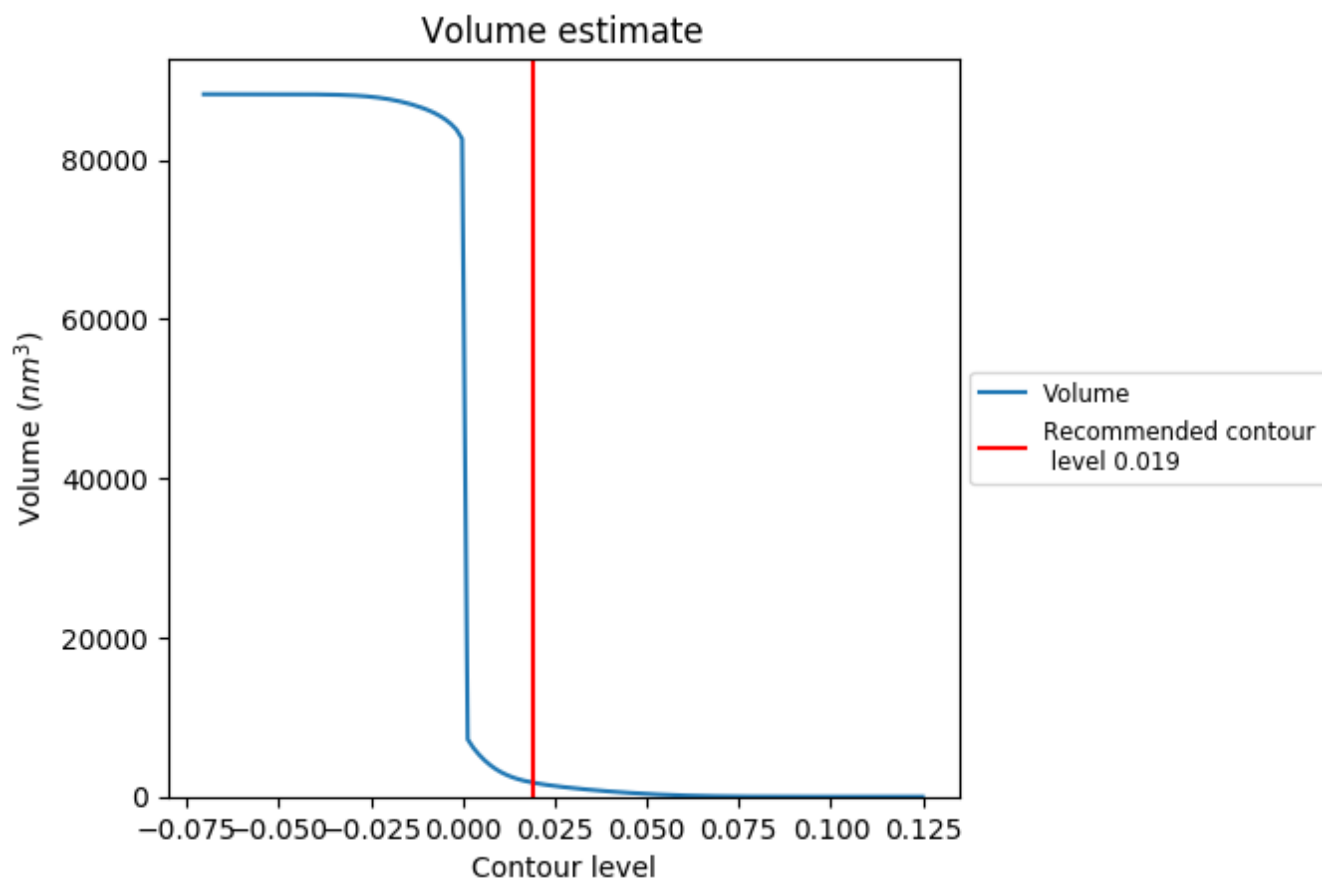

The volume at the recommended contour level is 1776  $\text{nm}^3$ ; this corresponds to an approximate mass of 1604 kDa.

The volume estimate graph shows how the enclosed volume varies with the contour level. The recommended contour level is shown as a vertical line and the intersection between the line and the curve gives the volume of the enclosed surface at the given level.

7.3 Rotationally averaged power spectrum i

PT

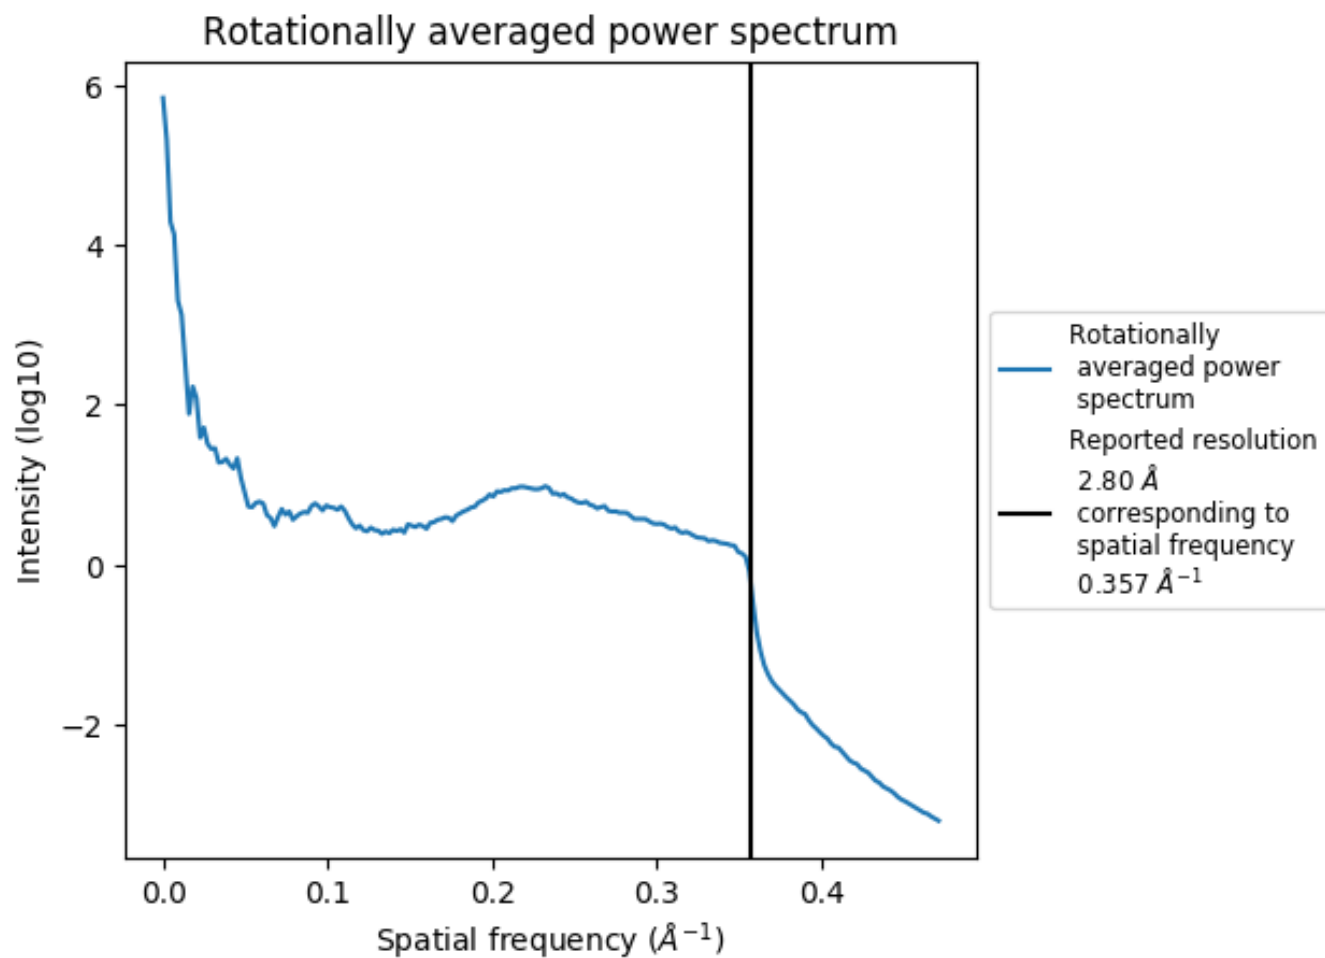

CONFIDENTIAL

## 8 Fourier-Shell correlation [i](#)

This section was not generated. No FSC curve or half maps provided.

**CONFIDENTIAL VALIDATION REPORT**

## 9 Map-model fit [i](#)

This section contains information regarding the fit between EMDB map EMD-11166 and PDB model 6ZCL. Per-residue inclusion information can be found in section 3 on page 5.

### 9.1 Map-model overlay [i](#)

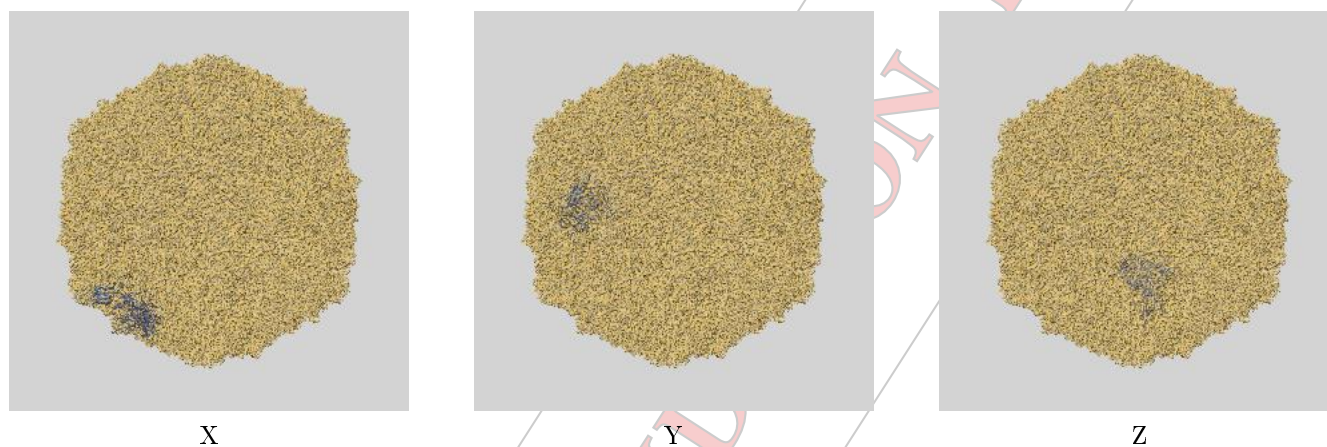

The images above show the 3D surface view of the map at the recommended contour level 0.019 at 50% transparency in yellow overlaid with a ribbon representation of the model coloured in blue. These images allow for the visual assessment of the quality of fit between the atomic model and the map.

## 9.2 Atom inclusion [i](#)

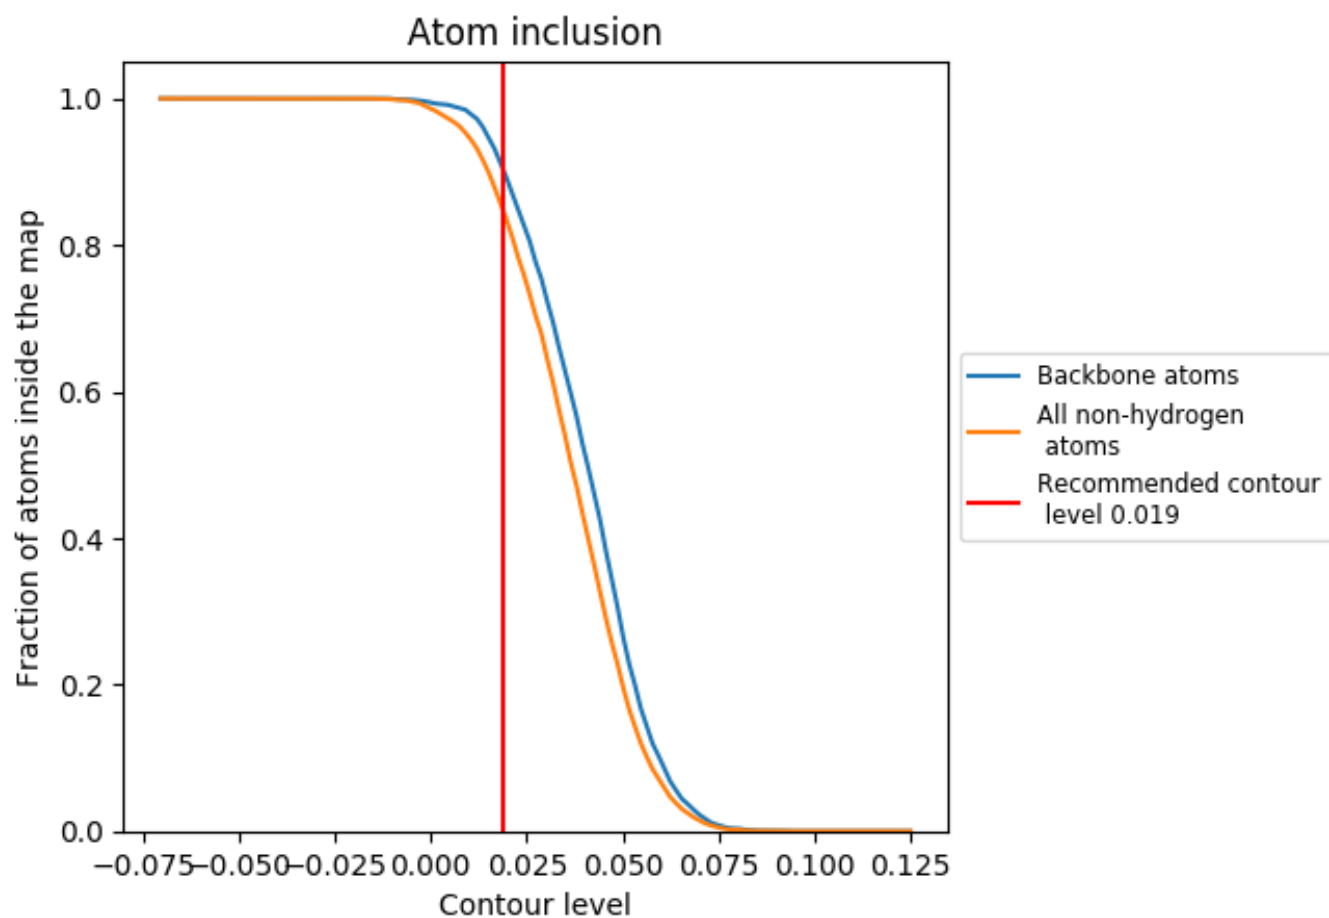

At the recommended contour level, 90% of all backbone atoms, 84% of all non-hydrogen atoms, are inside the map.

CONFIDENTIAL





# Full wwPDB EM Map/Model Validation Report ⓘ

Jul 16, 2020 – 01:42 PM BST

PDB ID : 6ZMS  
EMDB ID : EMD-11300  
Title : Cocksackievirus B4 strain E2  
Deposited on : 2020-07-03  
Resolution : 3.40 Å(reported)

This is a Full wwPDB EM Map/Model Validation Report.

This report is produced by the wwPDB biocuration pipeline after annotation of the structure.

We welcome your comments at [validation@mail.wwpdb.org](mailto:validation@mail.wwpdb.org)

A user guide is available at

<https://www.wwpdb.org/validation/2017/EMValidationReportHelp>

with specific help available everywhere you see the ⓘ symbol.

---

The following versions of software and data (see [references ⓘ](#)) were used in the production of this report:

EMDB validation analysis : 0.0.0.dev33  
MolProbity : 4.02b-467  
Percentile statistics : 20191225.v01 (using entries in the PDB archive December 25th 2019)  
Ideal geometry (proteins) : Engh & Huber (2001)  
Ideal geometry (DNA, RNA) : Parkinson et al. (1996)  
Validation Pipeline (wwPDB-VP) : 2.13.dev1

# 1 Overall quality at a glance i

The following experimental techniques were used to determine the structure:  
*ELECTRON MICROSCOPY*

The reported resolution of this entry is 3.40 Å.

Percentile scores (ranging between 0-100) for global validation metrics of the entry are shown in the following graphic. The table shows the number of entries on which the scores are based.

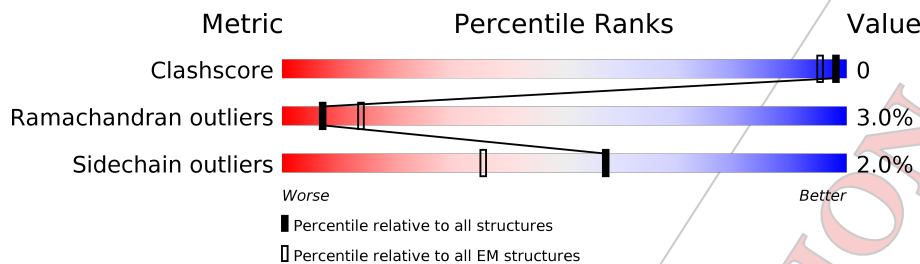

| Metric                | Whole archive (#Entries) | EM structures (#Entries) |
|-----------------------|--------------------------|--------------------------|
| Clashscore            | 158937                   | 4297                     |
| Ramachandran outliers | 154571                   | 4023                     |
| Sidechain outliers    | 154315                   | 3826                     |

The table below summarises the geometric issues observed across the polymeric chains and their fit to the map. The red, orange, yellow and green segments on the bar indicate the fraction of residues that contain outliers for  $\geq 3$ , 2, 1 and 0 types of geometric quality criteria respectively. A grey segment represents the fraction of residues that are not modelled. The numeric value for each fraction is indicated below the corresponding segment, with a dot representing fractions  $\leq 5\%$ . The upper red bar (where present) indicates the fraction of residues that have poor fit to the EM map (all atom inclusion  $< 40\%$ ). The numeric value is given above the bar.

| Mol | Chain | Length | Quality of chain                             |
|-----|-------|--------|----------------------------------------------|
| 1   | A     | 271    | 96% <span style="float: right;">•</span>     |
| 2   | B     | 252    | 94% <span style="float: right;">5% •</span>  |
| 3   | C     | 238    | 95% <span style="float: right;">• •</span>   |
| 4   | D     | 69     | 80% <span style="float: right;">• 17%</span> |

## 2 Entry composition i

There are 4 unique types of molecules in this entry. The entry contains 12570 atoms, of which 6173 are hydrogens and 0 are deuteriums.

In the tables below, the AltConf column contains the number of residues with at least one atom in alternate conformation and the Trace column contains the number of residues modelled with at most 2 atoms.

- Molecule 1 is a protein called Genome polyprotein.

| Mol | Chain | Residues | Atoms |      |      |     |     | AltConf | Trace |   |
|-----|-------|----------|-------|------|------|-----|-----|---------|-------|---|
|     |       |          | Total | C    | H    | N   | O   |         |       | S |
| 1   | A     | 271      | Total | C    | H    | N   | O   | S       | 0     | 0 |
|     |       |          | 4236  | 1348 | 2083 | 379 | 411 | 15      |       |   |

- Molecule 2 is a protein called Genome polyprotein.

| Mol | Chain | Residues | Atoms |      |      |     |     | AltConf | Trace |   |
|-----|-------|----------|-------|------|------|-----|-----|---------|-------|---|
|     |       |          | Total | C    | H    | N   | O   |         |       | S |
| 2   | B     | 252      | Total | C    | H    | N   | O   | S       | 0     | 0 |
|     |       |          | 3782  | 1221 | 1841 | 326 | 376 | 18      |       |   |

- Molecule 3 is a protein called Genome polyprotein.

| Mol | Chain | Residues | Atoms |      |      |     |     | AltConf | Trace |   |
|-----|-------|----------|-------|------|------|-----|-----|---------|-------|---|
|     |       |          | Total | C    | H    | N   | O   |         |       | S |
| 3   | C     | 238      | Total | C    | H    | N   | O   | S       | 0     | 0 |
|     |       |          | 3661  | 1182 | 1808 | 304 | 350 | 17      |       |   |

- Molecule 4 is a protein called Genome polyprotein.

| Mol | Chain | Residues | Atoms |     |     |    |    | AltConf | Trace |   |
|-----|-------|----------|-------|-----|-----|----|----|---------|-------|---|
|     |       |          | Total | C   | H   | N  | O  |         |       | S |
| 4   | D     | 57       | Total | C   | H   | N  | O  | S       | 0     | 0 |
|     |       |          | 891   | 280 | 441 | 78 | 91 | 1       |       |   |

### 3 Residue-property plots [\(i\)](#)

These plots are drawn for all protein, RNA, DNA and oligosaccharide chains in the entry. The first graphic for a chain summarises the proportions of the various outlier classes displayed in the second graphic. The second graphic shows the sequence view annotated by issues in geometry and atom inclusion in map density. Residues are color-coded according to the number of geometric quality criteria for which they contain at least one outlier: green = 0, yellow = 1, orange = 2 and red = 3 or more. A red diamond above a residue indicates a poor fit to the EM map for this residue (all atom inclusion < 40%). Stretches of 2 or more consecutive residues without any outlier are shown as a green connector. Residues present in the sample, but not in the model, are shown in grey.

- Molecule 1: Genome polyprotein

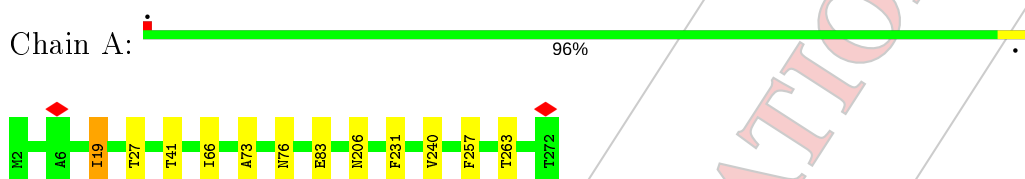

- Molecule 2: Genome polyprotein

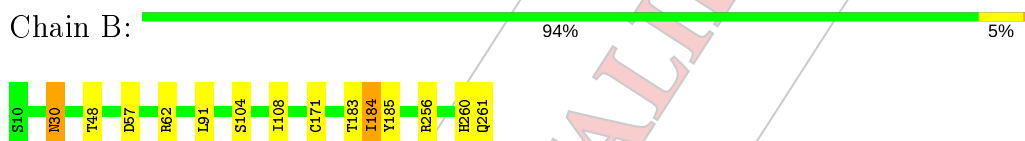

- Molecule 3: Genome polyprotein

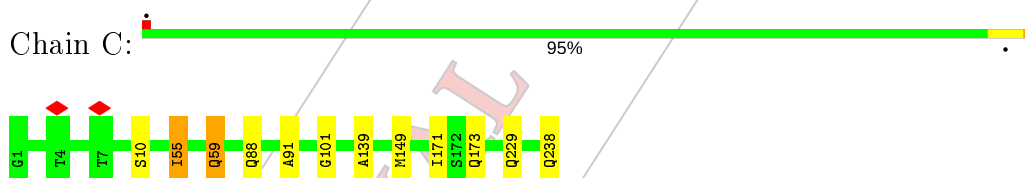

- Molecule 4: Genome polyprotein

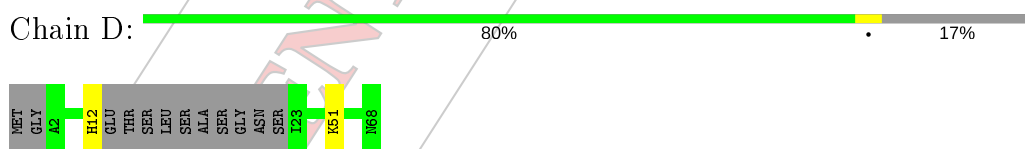

## 4 Experimental information i

| Property                             | Value                                   | Source    |
|--------------------------------------|-----------------------------------------|-----------|
| EM reconstruction method             | SINGLE PARTICLE                         | Depositor |
| Imposed symmetry                     | POINT, Not provided                     | Depositor |
| Number of particles used             | 40627                                   | Depositor |
| Resolution determination method      | FSC 0.143 CUT-OFF                       | Depositor |
| CTF correction method                | PHASE FLIPPING AND AMPLITUDE CORRECTION | Depositor |
| Microscope                           | TFS TALOS F200C                         | Depositor |
| Voltage (kV)                         | 200                                     | Depositor |
| Electron dose ( $e^-/\text{\AA}^2$ ) | 40                                      | Depositor |
| Minimum defocus (nm)                 | Not provided                            | Depositor |
| Maximum defocus (nm)                 | Not provided                            | Depositor |
| Magnification                        | Not provided                            | Depositor |
| Image detector                       | FEI FALCON III (4k x 4k)                | Depositor |
| Maximum map value                    | 0.083                                   | Depositor |
| Minimum map value                    | -0.046                                  | Depositor |
| Average map value                    | 0.001                                   | Depositor |
| Map value standard deviation         | 0.005                                   | Depositor |
| Recommended contour level            | 0.00816                                 | Depositor |
| Map size (Å)                         | 496.0, 496.0, 496.0                     | Depositor |
| Map dimensions                       | 400, 400, 400                           | Depositor |
| Map angles (°)                       | 90.0, 90.0, 90.0                        | Depositor |
| Pixel spacing (Å)                    | 1.24, 1.24, 1.24                        | Depositor |

## 5 Model quality i

### 5.1 Standard geometry i

The Z score for a bond length (or angle) is the number of standard deviations the observed value is removed from the expected value. A bond length (or angle) with  $|Z| > 5$  is considered an outlier worth inspection. RMSZ is the root-mean-square of all Z scores of the bond lengths (or angles).

| Mol | Chain | Bond lengths |         | Bond angles |               |
|-----|-------|--------------|---------|-------------|---------------|
|     |       | RMSZ         | # Z  >5 | RMSZ        | # Z  >5       |
| 1   | A     | 0.91         | 0/2209  | 1.04        | 2/3006 (0.1%) |
| 2   | B     | 0.90         | 0/1991  | 1.00        | 0/2720        |
| 3   | C     | 0.90         | 0/1900  | 1.00        | 0/2585        |
| 4   | D     | 0.86         | 0/457   | 0.97        | 0/614         |
| All | All   | 0.90         | 0/6557  | 1.01        | 2/8925 (0.0%) |

Chiral center outliers are detected by calculating the chiral volume of a chiral center and verifying if the center is modelled as a planar moiety or with the opposite hand. A planarity outlier is detected by checking planarity of atoms in a peptide group, atoms in a mainchain group or atoms of a sidechain that are expected to be planar.

| Mol | Chain | #Chirality outliers | #Planarity outliers |
|-----|-------|---------------------|---------------------|
| 2   | B     | 0                   | 1                   |
| 4   | D     | 0                   | 1                   |
| All | All   | 0                   | 2                   |

There are no bond length outliers.

All (2) bond angle outliers are listed below:

| Mol | Chain | Res | Type | Atoms     | Z     | Observed(°) | Ideal(°) |
|-----|-------|-----|------|-----------|-------|-------------|----------|
| 1   | A     | 231 | PHE  | CB-CG-CD2 | -5.57 | 116.90      | 120.80   |
| 1   | A     | 231 | PHE  | CB-CG-CD1 | 5.55  | 124.69      | 120.80   |

There are no chirality outliers.

All (2) planarity outliers are listed below:

| Mol | Chain | Res | Type | Group     |
|-----|-------|-----|------|-----------|
| 2   | B     | 185 | TYR  | Sidechain |
| 4   | D     | 12  | HIS  | Sidechain |



## 5.2 Too-close contacts [i](#)

In the following table, the Non-H and H(model) columns list the number of non-hydrogen atoms and hydrogen atoms in the chain respectively. The H(added) column lists the number of hydrogen atoms added and optimized by MolProbity. The Clashes column lists the number of clashes within the asymmetric unit, whereas Symm-Clashes lists symmetry related clashes.

| Mol | Chain | Non-H | H(model) | H(added) | Clashes | Symm-Clashes |
|-----|-------|-------|----------|----------|---------|--------------|
| 1   | A     | 2153  | 2083     | 2080     | 1       | 0            |
| 2   | B     | 1941  | 1841     | 1838     | 2       | 0            |
| 3   | C     | 1853  | 1808     | 1808     | 1       | 0            |
| 4   | D     | 450   | 441      | 434      | 0       | 0            |
| All | All   | 6397  | 6173     | 6160     | 4       | 0            |

The all-atom clashscore is defined as the number of clashes found per 1000 atoms (including hydrogen atoms). The all-atom clashscore for this structure is 0.

All (4) close contacts within the same asymmetric unit are listed below, sorted by their clash magnitude.

| Atom-1           | Atom-2           | Interatomic distance (Å) | Clash overlap (Å) |
|------------------|------------------|--------------------------|-------------------|
| 2:B:108:ILE:H    | 2:B:108:ILE:HD12 | 1.66                     | 0.61              |
| 1:A:19:ILE:H     | 1:A:19:ILE:HD13  | 1.81                     | 0.46              |
| 2:B:184:ILE:HD12 | 2:B:184:ILE:H    | 1.84                     | 0.42              |
| 3:C:55:ILE:H     | 3:C:55:ILE:HD13  | 1.84                     | 0.42              |

There are no symmetry-related clashes.

## 5.3 Torsion angles [i](#)

### 5.3.1 Protein backbone [i](#)

In the following table, the Percentiles column shows the percent Ramachandran outliers of the chain as a percentile score with respect to all PDB entries followed by that with respect to all EM entries.

The Analysed column shows the number of residues for which the backbone conformation was analysed, and the total number of residues.

| Mol | Chain | Analysed      | Favoured  | Allowed | Outliers | Percentiles |    |
|-----|-------|---------------|-----------|---------|----------|-------------|----|
| 1   | A     | 269/271 (99%) | 246 (91%) | 15 (6%) | 8 (3%)   | 4           | 23 |
| 2   | B     | 250/252 (99%) | 229 (92%) | 13 (5%) | 8 (3%)   | 4           | 22 |
| 3   | C     | 236/238 (99%) | 215 (91%) | 14 (6%) | 7 (3%)   | 4           | 23 |

*Continued on next page...*

Continued from previous page...

| Mol | Chain | Analysed      | Favoured  | Allowed | Outliers | Percentiles |    |
|-----|-------|---------------|-----------|---------|----------|-------------|----|
| 4   | D     | 51/69 (74%)   | 47 (92%)  | 3 (6%)  | 1 (2%)   | 7           | 30 |
| All | All   | 806/830 (97%) | 737 (91%) | 45 (6%) | 24 (3%)  | 7           | 23 |

All (24) Ramachandran outliers are listed below:

| Mol | Chain | Res | Type |
|-----|-------|-----|------|
| 2   | B     | 171 | CYS  |
| 3   | C     | 88  | GLN  |
| 1   | A     | 66  | ILE  |
| 1   | A     | 76  | ASN  |
| 1   | A     | 206 | ASN  |
| 2   | B     | 30  | ASN  |
| 2   | B     | 260 | HIS  |
| 1   | A     | 41  | THR  |
| 1   | A     | 73  | ALA  |
| 2   | B     | 57  | ASP  |
| 2   | B     | 62  | ARG  |
| 3   | C     | 59  | GLN  |
| 3   | C     | 91  | ALA  |
| 3   | C     | 101 | GLY  |
| 3   | C     | 139 | ALA  |
| 4   | D     | 51  | LYS  |
| 1   | A     | 240 | VAL  |
| 1   | A     | 257 | PHE  |
| 3   | C     | 10  | SER  |
| 2   | B     | 48  | THR  |
| 2   | B     | 104 | SER  |
| 2   | B     | 183 | THR  |
| 1   | A     | 83  | GLU  |
| 3   | C     | 171 | ILE  |

### 5.3.2 Protein sidechains [i](#)

In the following table, the Percentiles column shows the percent sidechain outliers of the chain as a percentile score with respect to all PDB entries followed by that with respect to all EM entries.

The Analysed column shows the number of residues for which the sidechain conformation was analysed, and the total number of residues.

| Mol | Chain | Analysed       | Rotameric | Outliers | Percentiles |     |
|-----|-------|----------------|-----------|----------|-------------|-----|
| 1   | A     | 242/242 (100%) | 239 (99%) | 3 (1%)   | 71          | 85  |
| 2   | B     | 210/210 (100%) | 205 (98%) | 5 (2%)   | 49          | 74  |
| 3   | C     | 207/207 (100%) | 201 (97%) | 6 (3%)   | 42          | 69  |
| 4   | D     | 50/59 (85%)    | 50 (100%) | 0        | 100         | 100 |
| All | All   | 709/718 (99%)  | 695 (98%) | 14 (2%)  | 57          | 77  |

All (14) residues with a non-rotameric sidechain are listed below:

| Mol | Chain | Res | Type |
|-----|-------|-----|------|
| 1   | A     | 19  | ILE  |
| 1   | A     | 27  | THR  |
| 1   | A     | 263 | THR  |
| 2   | B     | 30  | ASN  |
| 2   | B     | 91  | LEU  |
| 2   | B     | 184 | ILE  |
| 2   | B     | 256 | ARG  |
| 2   | B     | 261 | GLN  |
| 3   | C     | 55  | ILE  |
| 3   | C     | 59  | GLN  |
| 3   | C     | 149 | MET  |
| 3   | C     | 173 | GLN  |
| 3   | C     | 229 | GLN  |
| 3   | C     | 238 | GLN  |

Some sidechains can be flipped to improve hydrogen bonding and reduce clashes. All (7) such sidechains are listed below:

| Mol | Chain | Res | Type |
|-----|-------|-----|------|
| 1   | A     | 131 | GLN  |
| 1   | A     | 214 | HIS  |
| 1   | A     | 248 | GLN  |
| 2   | B     | 167 | GLN  |
| 2   | B     | 206 | ASN  |
| 3   | C     | 20  | GLN  |
| 4   | D     | 12  | HIS  |

### 5.3.3 RNA [i](#)

There are no RNA molecules in this entry.

## 5.4 Non-standard residues in protein, DNA, RNA chains [i](#)

There are no non-standard protein/DNA/RNA residues in this entry.

## 5.5 Carbohydrates [i](#)

There are no carbohydrates in this entry.

## 5.6 Ligand geometry [i](#)

There are no ligands in this entry.

## 5.7 Other polymers [i](#)

There are no such residues in this entry.

## 5.8 Polymer linkage issues [i](#)

The following chains have linkage breaks:

| Mol | Chain | Number of breaks |
|-----|-------|------------------|
| 4   | D     | 1                |

All chain breaks are listed below:

| Model | Chain | Residue-1 | Atom-1 | Residue-2 | Atom-2 | Distance (Å) |
|-------|-------|-----------|--------|-----------|--------|--------------|
| 1     | D     | 10:GLY    | C      | 11:ALA    | N      | 3.36         |

## 6 Map visualisation [i](#)

This section contains visualisations of the EMDB entry EMD-11300. These are intended to permit visual inspection of the internal detail of the map and identification of artifacts.

### 6.1 Orthogonal projections [i](#)

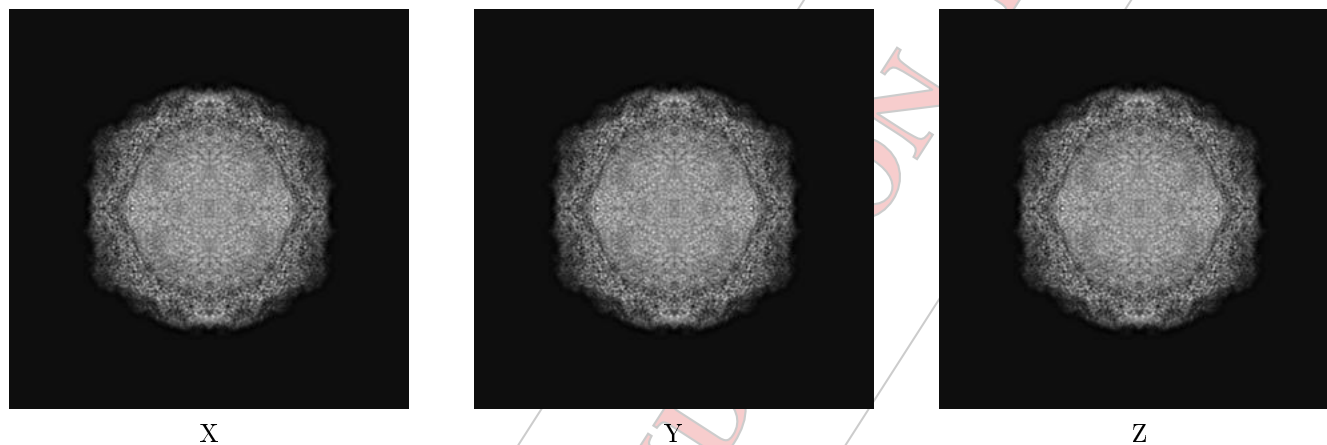

The images above show the map projected in three orthogonal projections, in greyscale.

### 6.2 Central slices [i](#)

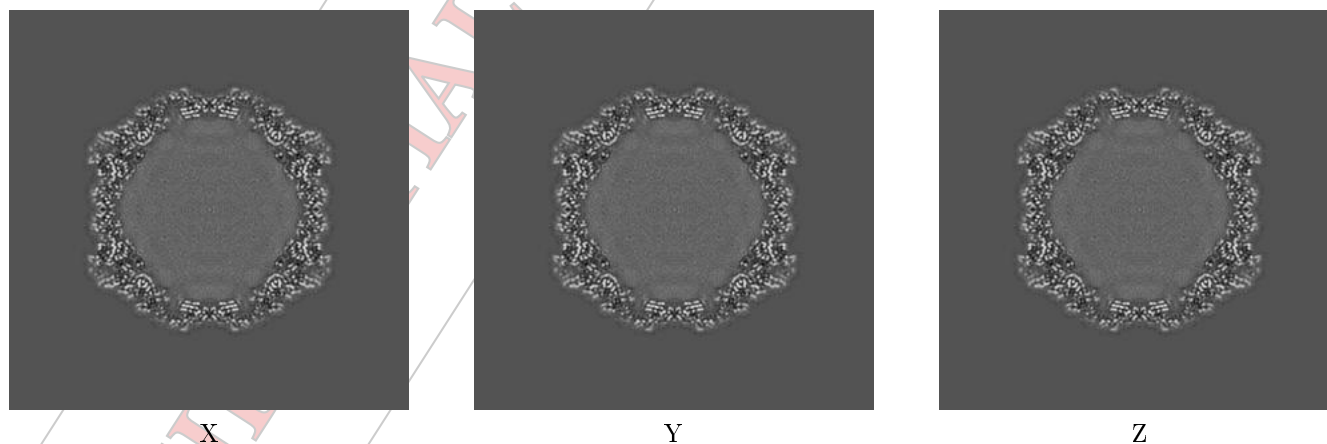

The images above show central slices of the map in three orthogonal directions, in greyscale.

### 6.3 Largest variance slices [i](#)

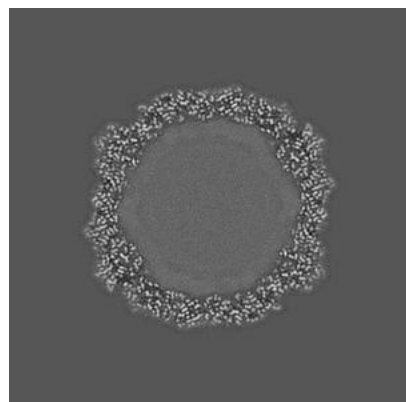

X Index: 212

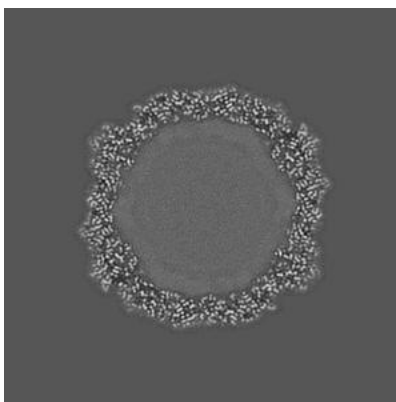

Y Index: 212

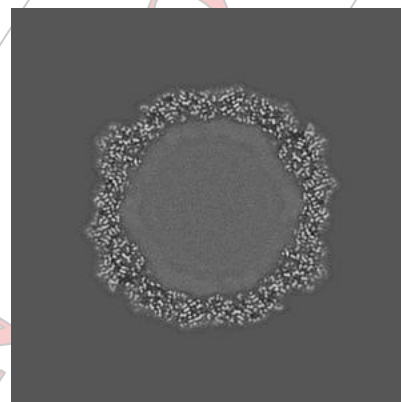

Z Index: 212

The images above show the highest variance slices of the map in three orthogonal directions, in greyscale.

### 6.4 Orthogonal surface views [i](#)

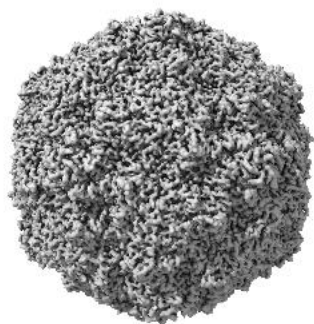

X

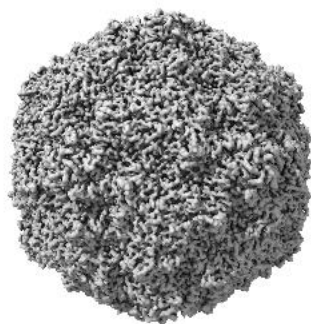

Y

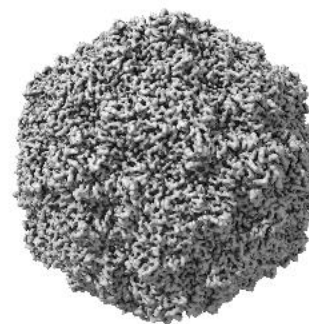

Z

The images above show the 3D surface view of the map at the recommended contour level 0.00816. This in conjunction with the slice images can indicate whether an appropriate contour level has been selected.

### 6.5 Mask visualisation [i](#)

This section was not generated. No masks were provided.

## 7 Map analysis [i](#)

This section contains the results of statistical analysis of the map.

### 7.1 Map-value distribution [i](#)

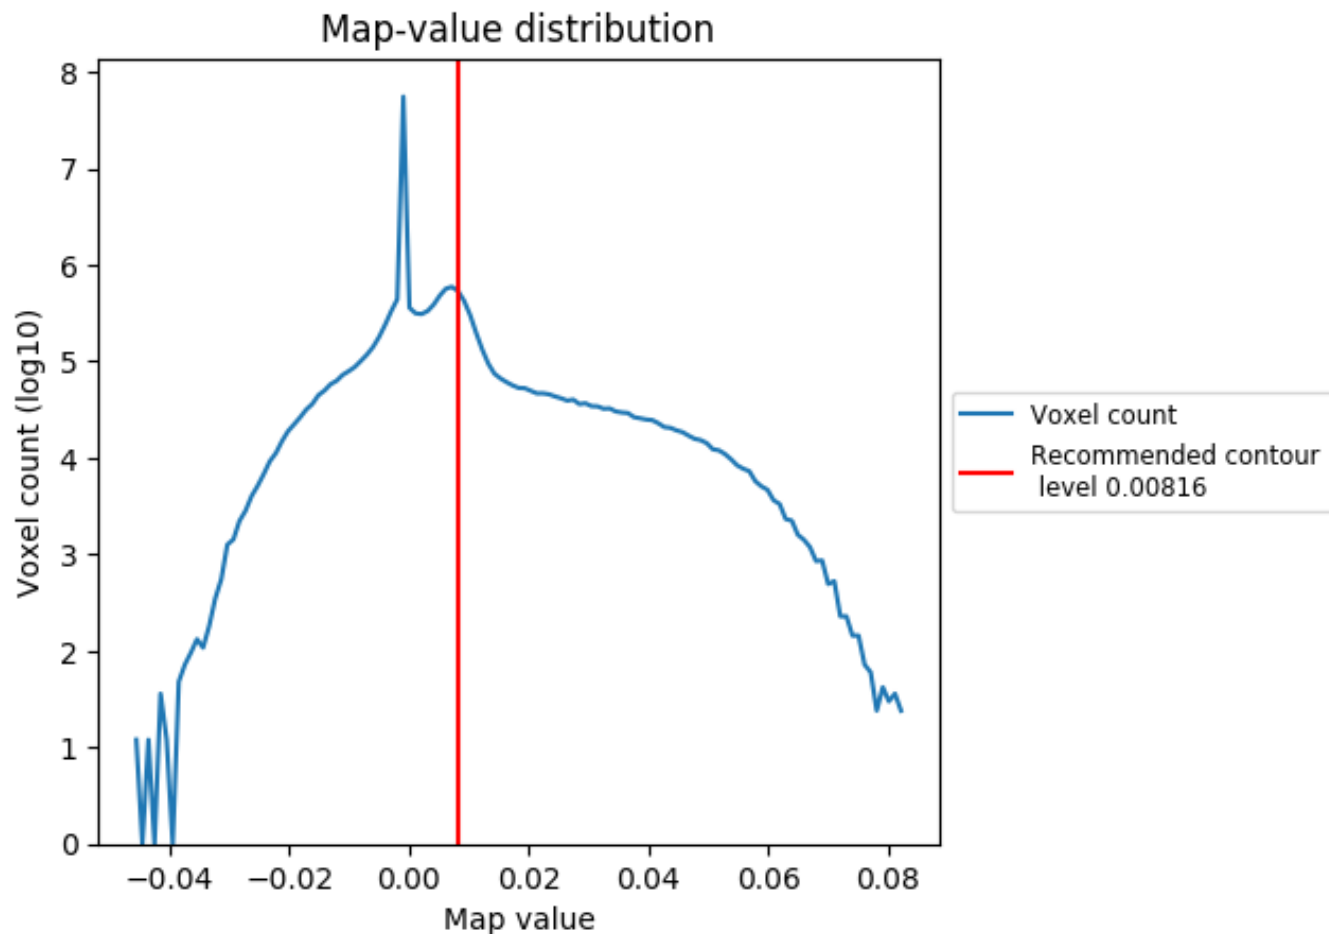

The map-value distribution is plotted in 128 intervals along the x-axis. The y-axis is logarithmic. A spike in this graph at zero usually indicates that the volume has been masked.

## 7.2 Volume estimate [i](#)

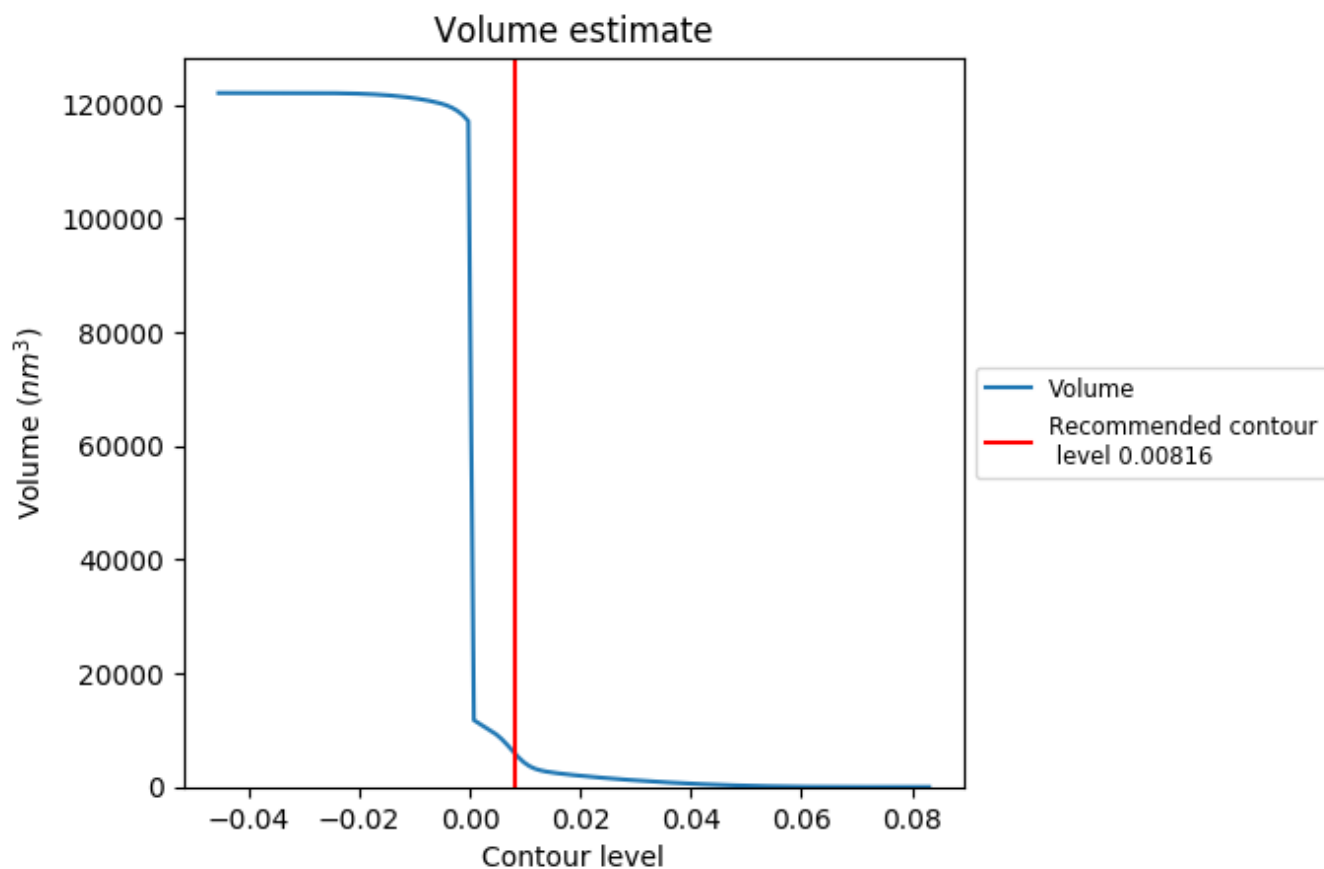

The volume at the recommended contour level is 58720  $\text{nm}^3$ ; this corresponds to an approximate mass of 5304 kDa.

The volume estimate graph shows how the enclosed volume varies with the contour level. The recommended contour level is shown as a vertical line and the intersection between the line and the curve gives the volume of the enclosed surface at the given level.



7.3 Rotationally averaged power spectrum i

PT

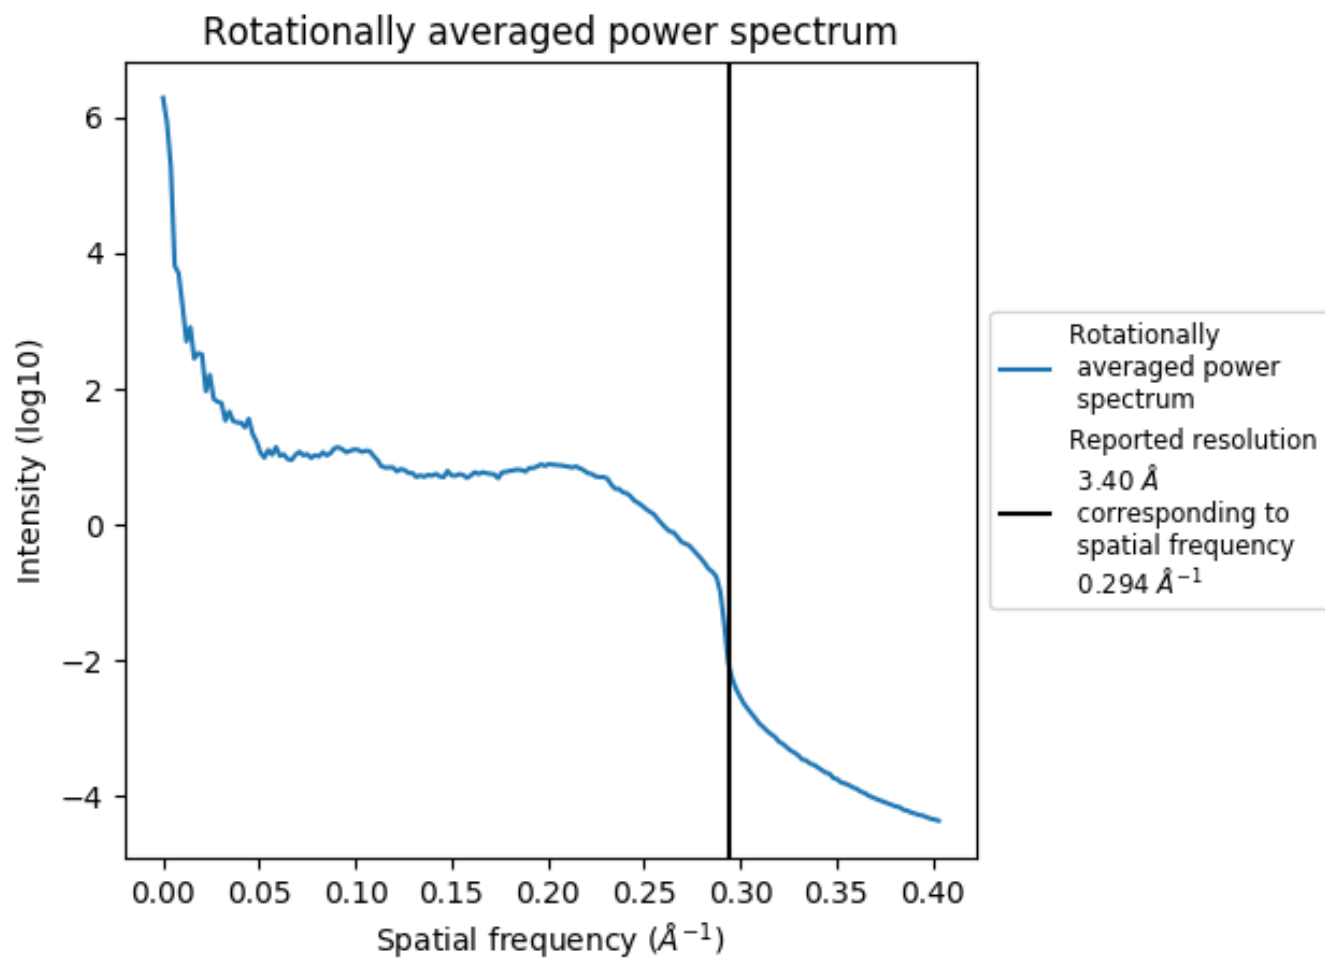

CONFIDENTIAL

## 8 Fourier-Shell correlation [i](#)

This section was not generated. No FSC curve or half maps provided.

**CONFIDENTIAL VALIDATION REPORT**

## 9 Map-model fit [i](#)

This section contains information regarding the fit between EMDB map EMD-11300 and PDB model 6ZMS. Per-residue inclusion information can be found in section 3 on page 4.

### 9.1 Map-model overlay [i](#)

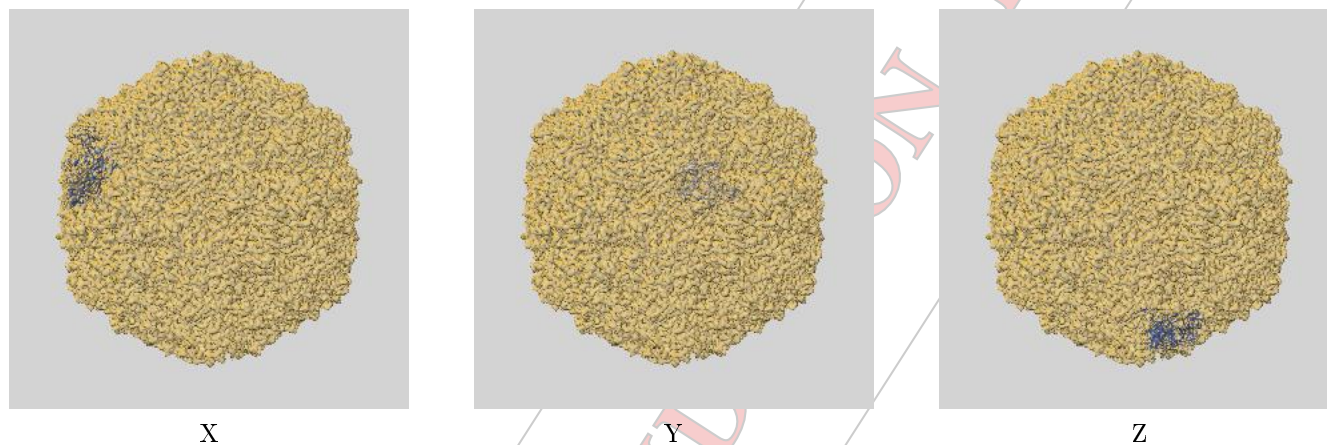

The images above show the 3D surface view of the map at the recommended contour level 0.00816 at 50% transparency in yellow overlaid with a ribbon representation of the model coloured in blue. These images allow for the visual assessment of the quality of fit between the atomic model and the map.

## 9.2 Atom inclusion [i](#)

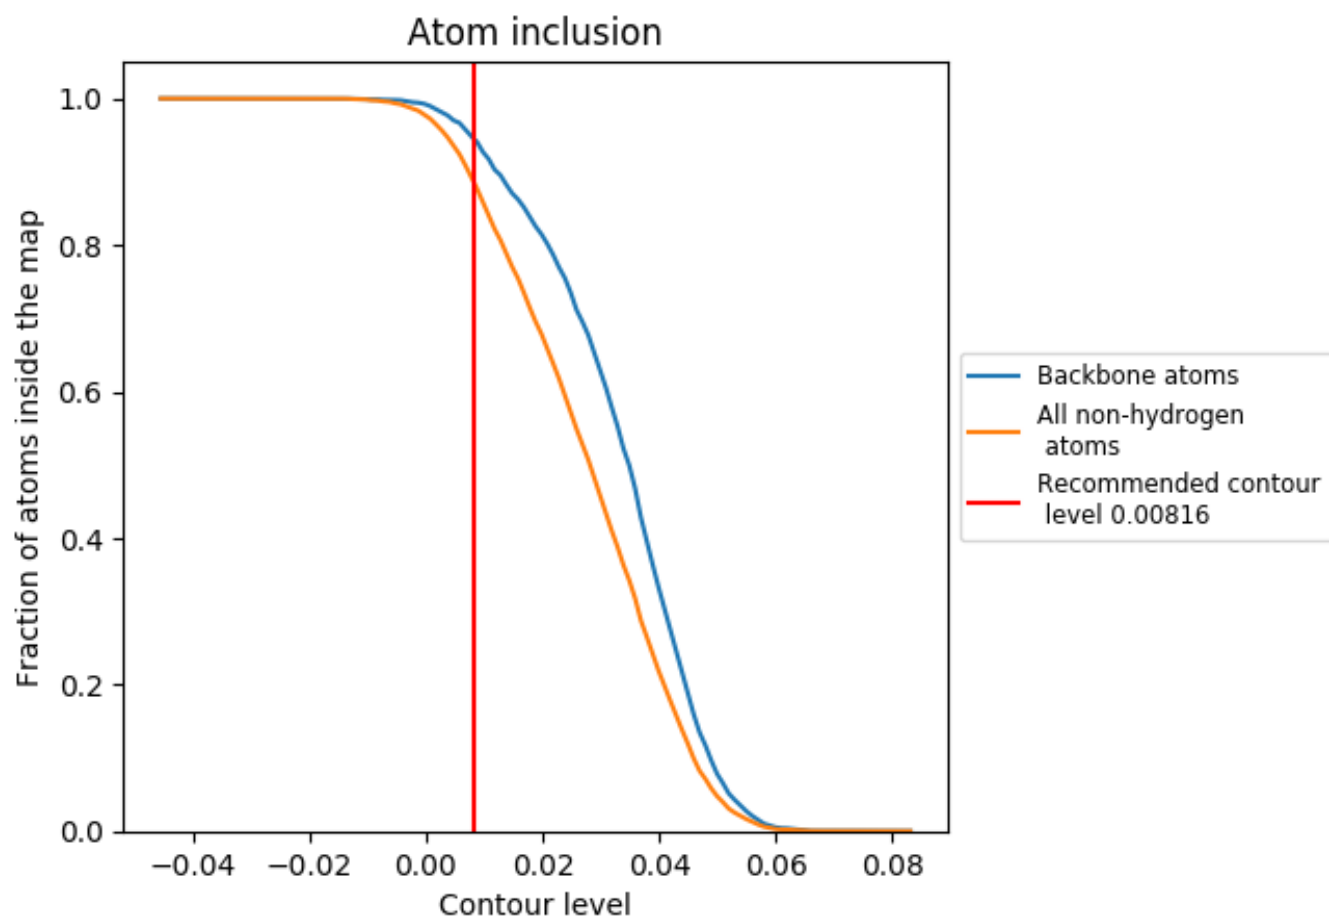

At the recommended contour level, 95% of all backbone atoms, 89% of all non-hydrogen atoms, are inside the map.

CONFIDENTIAL



# Full wwPDB EM Map/Model Validation Report ⓘ

Jul 3, 2020 – 11:43 AM BST

PDB ID : 6ZCK  
EMDB ID : EMD-11165  
Title : Coxsackievirus B4 in complex with capsid binder compound 48  
Deposited on : 2020-06-11  
Resolution : 2.70 Å(reported)

This is a Full wwPDB EM Map/Model Validation Report.

This report is produced by the wwPDB biocuration pipeline after annotation of the structure.

We welcome your comments at [validation@mail.wwpdb.org](mailto:validation@mail.wwpdb.org)

A user guide is available at

<https://www.wwpdb.org/validation/2017/EMValidationReportHelp>

with specific help available everywhere you see the ⓘ symbol.

---

The following versions of software and data (see [references ⓘ](#)) were used in the production of this report:

EMDB validation analysis : 0.0.0.dev33  
Mogul : 1.8.5 (274361), CSD as541be (2020)  
MolProbity : 4.02b-467  
buster-report : 1.1.7 (2018)  
Percentile statistics : 20191225.v01 (using entries in the PDB archive December 25th 2019)  
Ideal geometry (proteins) : Engh & Huber (2001)  
Ideal geometry (DNA, RNA) : Parkinson et al. (1996)  
Validation Pipeline (wwPDB-VP) : 2.13.dev1

# 1 Overall quality at a glance i

The following experimental techniques were used to determine the structure:  
*ELECTRON MICROSCOPY*

The reported resolution of this entry is 2.70 Å.

Percentile scores (ranging between 0-100) for global validation metrics of the entry are shown in the following graphic. The table shows the number of entries on which the scores are based.

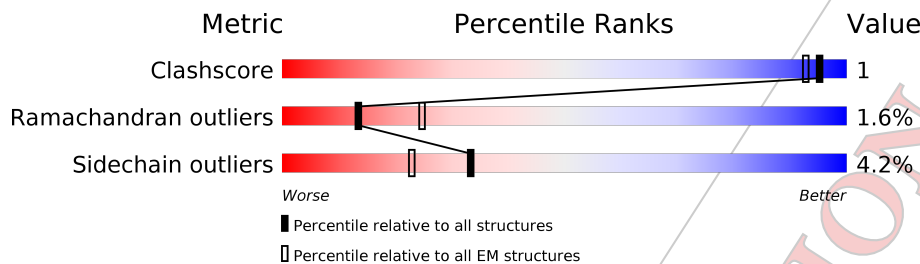

| Metric                | Whole archive (#Entries) | EM structures (#Entries) |
|-----------------------|--------------------------|--------------------------|
| Clashscore            | 158937                   | 4297                     |
| Ramachandran outliers | 154571                   | 4023                     |
| Sidechain outliers    | 154315                   | 3826                     |

The table below summarises the geometric issues observed across the polymeric chains and their fit to the map. The red, orange, yellow and green segments on the bar indicate the fraction of residues that contain outliers for  $\geq 3$ , 2, 1 and 0 types of geometric quality criteria respectively. A grey segment represents the fraction of residues that are not modelled. The numeric value for each fraction is indicated below the corresponding segment, with a dot representing fractions  $\leq 5\%$ . The upper red bar (where present) indicates the fraction of residues that have poor fit to the EM map (all atom inclusion  $< 40\%$ ). The numeric value is given above the bar.

| Mol | Chain | Length | Quality of chain |
|-----|-------|--------|------------------|
| 1   | A     | 271    |                  |
| 2   | B     | 252    |                  |
| 3   | C     | 238    |                  |
| 4   | D     | 58     |                  |

## 2 Entry composition [i](#)

There are 6 unique types of molecules in this entry. The entry contains 12628 atoms, of which 6185 are hydrogens and 0 are deuteriums.

In the tables below, the AltConf column contains the number of residues with at least one atom in alternate conformation and the Trace column contains the number of residues modelled with at most 2 atoms.

- Molecule 1 is a protein called Genome polyprotein.

| Mol | Chain | Residues | Atoms |      |      |     |     | AltConf | Trace |   |
|-----|-------|----------|-------|------|------|-----|-----|---------|-------|---|
|     |       |          | Total | C    | H    | N   | O   |         |       | S |
| 1   | A     | 271      | 4234  | 1348 | 2081 | 379 | 411 | 15      | 0     | 0 |

- Molecule 2 is a protein called Genome polyprotein.

| Mol | Chain | Residues | Atoms |      |      |     |     | AltConf | Trace |   |
|-----|-------|----------|-------|------|------|-----|-----|---------|-------|---|
|     |       |          | Total | C    | H    | N   | O   |         |       | S |
| 2   | B     | 252      | 3782  | 1221 | 1841 | 326 | 376 | 18      | 0     | 0 |

- Molecule 3 is a protein called Genome polyprotein.

| Mol | Chain | Residues | Atoms |      |      |     |     | AltConf | Trace |   |
|-----|-------|----------|-------|------|------|-----|-----|---------|-------|---|
|     |       |          | Total | C    | H    | N   | O   |         |       | S |
| 3   | C     | 238      | 3661  | 1182 | 1808 | 304 | 350 | 17      | 0     | 0 |

- Molecule 4 is a protein called Genome polyprotein.

| Mol | Chain | Residues | Atoms |     |     |    |    | AltConf | Trace |   |
|-----|-------|----------|-------|-----|-----|----|----|---------|-------|---|
|     |       |          | Total | C   | H   | N  | O  |         |       | S |
| 4   | D     | 58       | 889   | 282 | 436 | 79 | 91 | 1       | 0     | 0 |

There are 10 discrepancies between the modelled and reference sequences:

| Chain | Residue | Modelled | Actual | Comment  | Reference  |
|-------|---------|----------|--------|----------|------------|
| D     | ?       | -        | GLU    | deletion | UNP Q8V639 |
| D     | ?       | -        | THR    | deletion | UNP Q8V639 |
| D     | ?       | -        | SER    | deletion | UNP Q8V639 |
| D     | ?       | -        | LEU    | deletion | UNP Q8V639 |
| D     | ?       | -        | SER    | deletion | UNP Q8V639 |
| D     | ?       | -        | ALA    | deletion | UNP Q8V639 |
| D     | ?       | -        | SER    | deletion | UNP Q8V639 |
| D     | ?       | -        | GLY    | deletion | UNP Q8V639 |
| D     | ?       | -        | ASN    | deletion | UNP Q8V639 |

*Continued on next page...*

Continued from previous page...

| Chain | Residue | Modelled | Actual | Comment  | Reference  |
|-------|---------|----------|--------|----------|------------|
| D     | ?       | -        | SER    | deletion | UNP Q8V639 |

- Molecule 5 is 2-oxidanyl-4-[(6-propoxynaphthalen-2-yl)sulfonylamino]benzoic acid (three-letter code: QFW) (formula: C<sub>20</sub>H<sub>19</sub>NO<sub>6</sub>S) (labeled as "Ligand of Interest" by author).

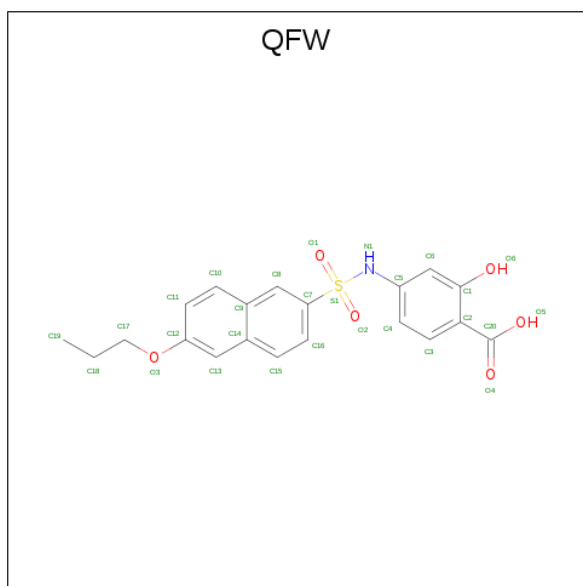

| Mol | Chain | Residues | Atoms |    |    |   |   | AltConf |   |
|-----|-------|----------|-------|----|----|---|---|---------|---|
|     |       |          | Total | C  | H  | N | O |         | S |
| 5   | C     | 1        | 47    | 20 | 19 | 1 | 6 | 1       | 0 |

- Molecule 6 is MYRISTIC ACID (three-letter code: MYR) (formula: C<sub>14</sub>H<sub>28</sub>O<sub>2</sub>).

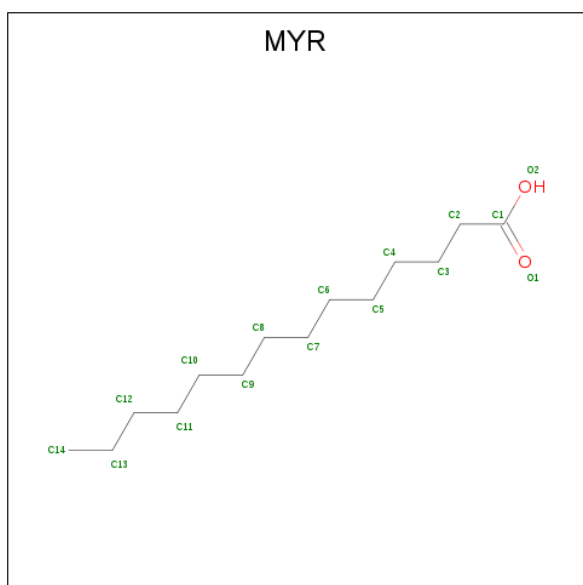



| Mol | Chain | Residues | Atoms |    |   | AltConf |
|-----|-------|----------|-------|----|---|---------|
|     |       |          | Total | C  | O |         |
| 6   | D     | 1        | 15    | 14 | 1 | 0       |

CONFIDENTIAL VALIDATION REPORT

### 3 Residue-property plots

These plots are drawn for all protein, RNA, DNA and oligosaccharide chains in the entry. The first graphic for a chain summarises the proportions of the various outlier classes displayed in the second graphic. The second graphic shows the sequence view annotated by issues in geometry and atom inclusion in map density. Residues are color-coded according to the number of geometric quality criteria for which they contain at least one outlier: green = 0, yellow = 1, orange = 2 and red = 3 or more. A red diamond above a residue indicates a poor fit to the EM map for this residue (all atom inclusion < 40%). Stretches of 2 or more consecutive residues without any outlier are shown as a green connector. Residues present in the sample, but not in the model, are shown in grey.

- Molecule 1: Genome polyprotein

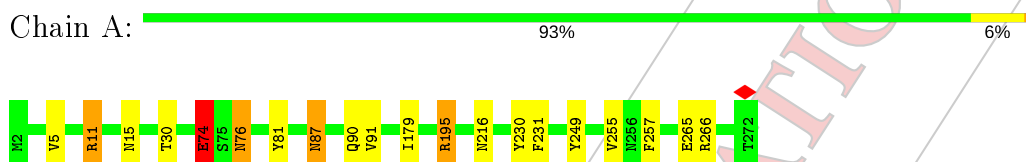

- Molecule 2: Genome polyprotein

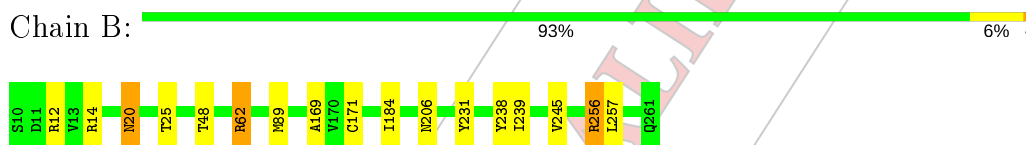

- Molecule 3: Genome polyprotein

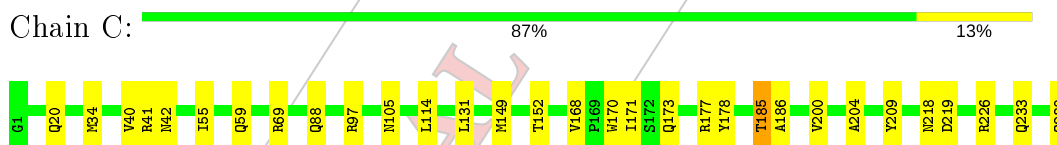

- Molecule 4: Genome polyprotein

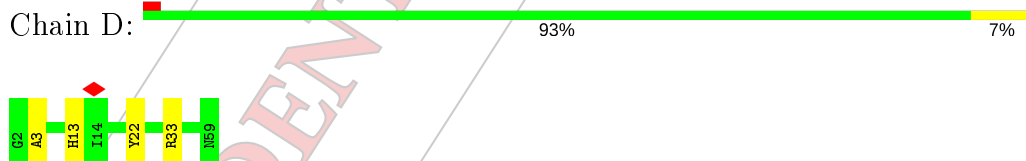

## 4 Experimental information i

| Property                             | Value                                   | Source    |
|--------------------------------------|-----------------------------------------|-----------|
| EM reconstruction method             | SINGLE PARTICLE                         | Depositor |
| Imposed symmetry                     | POINT, Not provided                     | Depositor |
| Number of particles used             | 13252                                   | Depositor |
| Resolution determination method      | FSC 0.143 CUT-OFF                       | Depositor |
| CTF correction method                | PHASE FLIPPING AND AMPLITUDE CORRECTION | Depositor |
| Microscope                           | FEI TITAN KRIOS                         | Depositor |
| Voltage (kV)                         | 300                                     | Depositor |
| Electron dose ( $e^-/\text{\AA}^2$ ) | 47                                      | Depositor |
| Minimum defocus (nm)                 | Not provided                            | Depositor |
| Maximum defocus (nm)                 | Not provided                            | Depositor |
| Magnification                        | Not provided                            | Depositor |
| Image detector                       | GATAN K2 SUMMIT (4k x 4k)               | Depositor |
| Maximum map value                    | 0.078                                   | Depositor |
| Minimum map value                    | -0.035                                  | Depositor |
| Average map value                    | 0.001                                   | Depositor |
| Map value standard deviation         | 0.006                                   | Depositor |
| Recommended contour level            | 0.00928                                 | Depositor |
| Map size (Å)                         | 445.19998, 445.19998, 445.19998         | Depositor |
| Map dimensions                       | 420, 420, 420                           | Depositor |
| Map angles (°)                       | 90.0, 90.0, 90.0                        | Depositor |
| Pixel spacing (Å)                    | 1.06, 1.06, 1.06                        | Depositor |

## 5 Model quality i

### 5.1 Standard geometry i

Bond lengths and bond angles in the following residue types are not validated in this section: QFW, MYR

The Z score for a bond length (or angle) is the number of standard deviations the observed value is removed from the expected value. A bond length (or angle) with  $|Z| > 5$  is considered an outlier worth inspection. RMSZ is the root-mean-square of all Z scores of the bond lengths (or angles).

| Mol | Chain | Bond lengths |               | Bond angles |                |
|-----|-------|--------------|---------------|-------------|----------------|
|     |       | RMSZ         | # Z  >5       | RMSZ        | # Z  >5        |
| 1   | A     | 0.91         | 0/2209        | 1.16        | 3/3006 (0.1%)  |
| 2   | B     | 0.91         | 0/1991        | 1.10        | 2/2720 (0.1%)  |
| 3   | C     | 0.92         | 0/1900        | 1.14        | 6/2585 (0.2%)  |
| 4   | D     | 0.89         | 1/460 (0.2%)  | 1.02        | 0/619          |
| All | All   | 0.91         | 1/6560 (0.0%) | 1.13        | 11/8930 (0.1%) |

Chiral center outliers are detected by calculating the chiral volume of a chiral center and verifying if the center is modelled as a planar moiety or with the opposite hand. A planarity outlier is detected by checking planarity of atoms in a peptide group, atoms in a mainchain group or atoms of a sidechain that are expected to be planar.

| Mol | Chain | #Chirality outliers | #Planarity outliers |
|-----|-------|---------------------|---------------------|
| 1   | A     | 0                   | 7                   |
| 2   | B     | 0                   | 4                   |
| 4   | D     | 0                   | 2                   |
| All | All   | 0                   | 13                  |

All (1) bond length outliers are listed below:

| Mol | Chain | Res | Type | Atoms | Z    | Observed(Å) | Ideal(Å) |
|-----|-------|-----|------|-------|------|-------------|----------|
| 4   | D     | 3   | ALA  | N-CA  | 5.94 | 1.58        | 1.46     |

All (11) bond angle outliers are listed below:

| Mol | Chain | Res | Type | Atoms     | Z     | Observed(°) | Ideal(°) |
|-----|-------|-----|------|-----------|-------|-------------|----------|
| 3   | C     | 41  | ARG  | NE-CZ-NH1 | 7.64  | 124.12      | 120.30   |
| 1   | A     | 74  | GLU  | N-CA-CB   | 6.51  | 122.31      | 110.60   |
| 3   | C     | 34  | MET  | CG-SD-CE  | -6.31 | 90.11       | 100.20   |
| 3   | C     | 177 | ARG  | NE-CZ-NH1 | 5.97  | 123.29      | 120.30   |
| 3   | C     | 209 | TYR  | CB-CG-CD1 | -5.92 | 117.45      | 121.00   |

*Continued on next page...*

Continued from previous page...

| Mol | Chain | Res | Type | Atoms     | Z     | Observed(°) | Ideal(°) |
|-----|-------|-----|------|-----------|-------|-------------|----------|
| 1   | A     | 231 | PHE  | CB-CG-CD1 | 5.88  | 124.92      | 120.80   |
| 3   | C     | 97  | ARG  | NE-CZ-NH1 | 5.75  | 123.17      | 120.30   |
| 1   | A     | 231 | PHE  | CB-CG-CD2 | -5.74 | 116.78      | 120.80   |
| 2   | B     | 62  | ARG  | NE-CZ-NH1 | 5.63  | 123.12      | 120.30   |
| 2   | B     | 12  | ARG  | NE-CZ-NH2 | -5.04 | 117.78      | 120.30   |
| 3   | C     | 69  | ARG  | NE-CZ-NH1 | 5.01  | 122.81      | 120.30   |

There are no chirality outliers.

All (13) planarity outliers are listed below:

| Mol | Chain | Res | Type | Group     |
|-----|-------|-----|------|-----------|
| 1   | A     | 11  | ARG  | Sidechain |
| 1   | A     | 195 | ARG  | Sidechain |
| 1   | A     | 230 | TYR  | Sidechain |
| 1   | A     | 249 | TYR  | Sidechain |
| 1   | A     | 255 | VAL  | Peptide   |
| 1   | A     | 266 | ARG  | Sidechain |
| 1   | A     | 81  | TYR  | Sidechain |
| 2   | B     | 14  | ARG  | Sidechain |
| 2   | B     | 231 | TYR  | Sidechain |
| 2   | B     | 238 | TYR  | Sidechain |
| 2   | B     | 256 | ARG  | Sidechain |
| 4   | D     | 13  | HIS  | Sidechain |
| 4   | D     | 33  | ARG  | Sidechain |

## 5.2 Too-close contacts [i](#)

In the following table, the Non-H and H(model) columns list the number of non-hydrogen atoms and hydrogen atoms in the chain respectively. The H(added) column lists the number of hydrogen atoms added and optimized by MolProbity. The Clashes column lists the number of clashes within the asymmetric unit, whereas Symm-Clashes lists symmetry related clashes.

| Mol | Chain | Non-H | H(model) | H(added) | Clashes | Symm-Clashes |
|-----|-------|-------|----------|----------|---------|--------------|
| 1   | A     | 2153  | 2081     | 2080     | 3       | 0            |
| 2   | B     | 1941  | 1841     | 1838     | 1       | 0            |
| 3   | C     | 1853  | 1808     | 1808     | 6       | 0            |
| 4   | D     | 453   | 436      | 437      | 5       | 0            |
| 5   | C     | 28    | 19       | 0        | 0       | 0            |
| 6   | D     | 15    | 0        | 27       | 4       | 0            |
| All | All   | 6443  | 6185     | 6190     | 12      | 0            |

The all-atom clashscore is defined as the number of clashes found per 1000 atoms (including hydrogen atoms). The all-atom clashscore for this structure is 1.

All (12) close contacts within the same asymmetric unit are listed below, sorted by their clash magnitude.

| Atom-1           | Atom-2           | Interatomic distance (Å) | Clash overlap (Å) |
|------------------|------------------|--------------------------|-------------------|
| 4:D:22:TYR:HD1   | 6:D:101:MYR:H131 | 1.44                     | 0.82              |
| 4:D:22:TYR:CD1   | 6:D:101:MYR:H131 | 2.28                     | 0.66              |
| 2:B:20:ASN:HD22  | 2:B:20:ASN:H     | 1.41                     | 0.65              |
| 4:D:22:TYR:CD1   | 6:D:101:MYR:C13  | 2.87                     | 0.57              |
| 1:A:87:ASN:HD21  | 1:A:90:GLN:HE21  | 1.53                     | 0.57              |
| 3:C:105:ASN:HD22 | 3:C:226:ARG:HH22 | 1.55                     | 0.55              |
| 1:A:91:VAL:HA    | 3:C:233:GLN:HE22 | 1.75                     | 0.51              |
| 3:C:20:GLN:HE22  | 4:D:22:TYR:H     | 1.58                     | 0.51              |
| 4:D:22:TYR:HD1   | 6:D:101:MYR:C13  | 2.16                     | 0.51              |
| 3:C:178:TYR:H    | 3:C:185:THR:HG21 | 1.78                     | 0.49              |
| 3:C:200:VAL:HG22 | 3:C:204:ALA:HB3  | 1.95                     | 0.47              |
| 1:A:5:VAL:HB     | 3:C:219:ASP:HA   | 2.04                     | 0.40              |

There are no symmetry-related clashes.

## 5.3 Torsion angles [i](#)

### 5.3.1 Protein backbone [i](#)

In the following table, the Percentiles column shows the percent Ramachandran outliers of the chain as a percentile score with respect to all PDB entries followed by that with respect to all EM entries.

The Analysed column shows the number of residues for which the backbone conformation was analysed, and the total number of residues.

| Mol | Chain | Analysed      | Favoured  | Allowed | Outliers | Percentiles |     |
|-----|-------|---------------|-----------|---------|----------|-------------|-----|
| 1   | A     | 269/271 (99%) | 246 (91%) | 18 (7%) | 5 (2%)   | 8           | 20  |
| 2   | B     | 250/252 (99%) | 233 (93%) | 13 (5%) | 4 (2%)   | 9           | 24  |
| 3   | C     | 236/238 (99%) | 222 (94%) | 10 (4%) | 4 (2%)   | 9           | 23  |
| 4   | D     | 52/58 (90%)   | 50 (96%)  | 2 (4%)  | 0        | 100         | 100 |
| All | All   | 807/819 (98%) | 751 (93%) | 43 (5%) | 13 (2%)  | 13          | 24  |

All (13) Ramachandran outliers are listed below:

| Mol | Chain | Res | Type |
|-----|-------|-----|------|
| 1   | A     | 195 | ARG  |
| 1   | A     | 74  | GLU  |
| 1   | A     | 76  | ASN  |
| 2   | B     | 62  | ARG  |
| 2   | B     | 169 | ALA  |
| 2   | B     | 171 | CYS  |
| 3   | C     | 88  | GLN  |
| 1   | A     | 257 | PHE  |
| 1   | A     | 265 | GLU  |
| 2   | B     | 257 | LEU  |
| 3   | C     | 171 | ILE  |
| 3   | C     | 170 | TRP  |
| 3   | C     | 186 | ALA  |

### 5.3.2 Protein sidechains [i](#)

In the following table, the Percentiles column shows the percent sidechain outliers of the chain as a percentile score with respect to all PDB entries followed by that with respect to all EM entries.

The Analysed column shows the number of residues for which the sidechain conformation was analysed, and the total number of residues.

| Mol | Chain | Analysed       | Rotameric | Outliers | Percentiles |     |
|-----|-------|----------------|-----------|----------|-------------|-----|
| 1   | A     | 242/242 (100%) | 234 (97%) | 8 (3%)   | 38          | 67  |
| 2   | B     | 210/210 (100%) | 201 (96%) | 9 (4%)   | 29          | 57  |
| 3   | C     | 207/207 (100%) | 194 (94%) | 13 (6%)  | 18          | 40  |
| 4   | D     | 50/50 (100%)   | 50 (100%) | 0        | 100         | 100 |
| All | All   | 709/709 (100%) | 679 (96%) | 30 (4%)  | 33          | 58  |

All (30) residues with a non-rotameric sidechain are listed below:

| Mol | Chain | Res | Type |
|-----|-------|-----|------|
| 1   | A     | 11  | ARG  |
| 1   | A     | 15  | ASN  |
| 1   | A     | 30  | THR  |
| 1   | A     | 74  | GLU  |
| 1   | A     | 76  | ASN  |
| 1   | A     | 87  | ASN  |
| 1   | A     | 179 | ILE  |
| 1   | A     | 216 | ASN  |
| 2   | B     | 20  | ASN  |

*Continued on next page...*

*Continued from previous page...*

| Mol | Chain | Res | Type |
|-----|-------|-----|------|
| 2   | B     | 25  | THR  |
| 2   | B     | 48  | THR  |
| 2   | B     | 89  | MET  |
| 2   | B     | 184 | ILE  |
| 2   | B     | 206 | ASN  |
| 2   | B     | 239 | ILE  |
| 2   | B     | 245 | VAL  |
| 2   | B     | 256 | ARG  |
| 3   | C     | 40  | VAL  |
| 3   | C     | 42  | ASN  |
| 3   | C     | 55  | ILE  |
| 3   | C     | 59  | GLN  |
| 3   | C     | 114 | LEU  |
| 3   | C     | 131 | LEU  |
| 3   | C     | 149 | MET  |
| 3   | C     | 152 | THR  |
| 3   | C     | 168 | VAL  |
| 3   | C     | 173 | GLN  |
| 3   | C     | 185 | THR  |
| 3   | C     | 218 | ASN  |
| 3   | C     | 238 | GLN  |

Some sidechains can be flipped to improve hydrogen bonding and reduce clashes. All (16) such sidechains are listed below:

| Mol | Chain | Res | Type |
|-----|-------|-----|------|
| 1   | A     | 57  | ASN  |
| 1   | A     | 90  | GLN  |
| 1   | A     | 214 | HIS  |
| 1   | A     | 216 | ASN  |
| 1   | A     | 248 | GLN  |
| 1   | A     | 256 | ASN  |
| 2   | B     | 20  | ASN  |
| 2   | B     | 95  | ASN  |
| 2   | B     | 118 | HIS  |
| 2   | B     | 167 | GLN  |
| 2   | B     | 206 | ASN  |
| 3   | C     | 20  | GLN  |
| 3   | C     | 105 | ASN  |
| 3   | C     | 195 | GLN  |
| 3   | C     | 218 | ASN  |
| 3   | C     | 233 | GLN  |



### 5.3.3 RNA [i](#)

There are no RNA molecules in this entry.

### 5.4 Non-standard residues in protein, DNA, RNA chains [i](#)

There are no non-standard protein/DNA/RNA residues in this entry.

### 5.5 Carbohydrates [i](#)

There are no carbohydrates in this entry.

### 5.6 Ligand geometry [i](#)

2 ligands are modelled in this entry.

In the following table, the Counts columns list the number of bonds (or angles) for which Mogul statistics could be retrieved, the number of bonds (or angles) that are observed in the model and the number of bonds (or angles) that are defined in the Chemical Component Dictionary. The Link column lists molecule types, if any, to which the group is linked. The Z score for a bond length (or angle) is the number of standard deviations the observed value is removed from the expected value. A bond length (or angle) with  $|Z| > 2$  is considered an outlier worth inspection. RMSZ is the root-mean-square of all Z scores of the bond lengths (or angles).

| Mol | Type | Chain | Res | Link | Bond lengths |      |          | Bond angles |      |          |
|-----|------|-------|-----|------|--------------|------|----------|-------------|------|----------|
|     |      |       |     |      | Counts       | RMSZ | # Z  > 2 | Counts      | RMSZ | # Z  > 2 |
| 5   | QFW  | C     | 301 | -    | 28,30,30     | 1.33 | 2 (7%)   | 39,43,43    | 1.25 | 5 (12%)  |
| 6   | MYR  | D     | 101 | 4    | 14,14,15     | 0.28 | 0        | 13,13,15    | 1.14 | 2 (15%)  |

In the following table, the Chirals column lists the number of chiral outliers, the number of chiral centers analysed, the number of these observed in the model and the number defined in the Chemical Component Dictionary. Similar counts are reported in the Torsion and Rings columns. '-' means no outliers of that kind were identified.

| Mol | Type | Chain | Res | Link | Chirals | Torsions   | Rings   |
|-----|------|-------|-----|------|---------|------------|---------|
| 5   | QFW  | C     | 301 | -    | -       | 4/15/19/19 | 0/3/3/3 |
| 6   | MYR  | D     | 101 | 4    | -       | 3/11/12/13 | -       |

All (2) bond length outliers are listed below:

| Mol | Chain | Res | Type | Atoms | Z    | Observed(Å) | Ideal(Å) |
|-----|-------|-----|------|-------|------|-------------|----------|
| 5   | C     | 301 | QFW  | S1-N1 | 5.26 | 1.72        | 1.63     |

Continued on next page...

Continued from previous page...

| Mol | Chain | Res | Type | Atoms   | Z    | Observed(Å) | Ideal(Å) |
|-----|-------|-----|------|---------|------|-------------|----------|
| 5   | C     | 301 | QFW  | C13-C12 | 2.12 | 1.40        | 1.37     |

All (7) bond angle outliers are listed below:

| Mol | Chain | Res | Type | Atoms       | Z     | Observed(°) | Ideal(°) |
|-----|-------|-----|------|-------------|-------|-------------|----------|
| 5   | C     | 301 | QFW  | C3-C2-C20   | -3.60 | 114.85      | 120.20   |
| 5   | C     | 301 | QFW  | C8-C7-S1    | -2.63 | 117.83      | 120.03   |
| 6   | D     | 101 | MYR  | C7-C6-C5    | -2.62 | 101.15      | 114.42   |
| 5   | C     | 301 | QFW  | C17-O3-C12  | -2.38 | 111.72      | 117.93   |
| 6   | D     | 101 | MYR  | C12-C11-C10 | -2.28 | 102.84      | 114.42   |
| 5   | C     | 301 | QFW  | C4-C5-N1    | 2.26  | 124.97      | 120.09   |
| 5   | C     | 301 | QFW  | C7-S1-N1    | -2.24 | 104.01      | 106.83   |

There are no chirality outliers.

All (7) torsion outliers are listed below:

| Mol | Chain | Res | Type | Atoms          |
|-----|-------|-----|------|----------------|
| 6   | D     | 101 | MYR  | C1-C2-C3-C4    |
| 6   | D     | 101 | MYR  | C7-C8-C9-C10   |
| 6   | D     | 101 | MYR  | C6-C7-C8-C9    |
| 5   | C     | 301 | QFW  | C16-C7-S1-O2   |
| 5   | C     | 301 | QFW  | C8-C7-S1-O2    |
| 5   | C     | 301 | QFW  | C11-C12-O3-C17 |
| 5   | C     | 301 | QFW  | C13-C12-O3-C17 |

There are no ring outliers.

1 monomer is involved in 4 short contacts:

| Mol | Chain | Res | Type | Clashes | Symm-Clashes |
|-----|-------|-----|------|---------|--------------|
| 6   | D     | 101 | MYR  | 4       | 0            |

The following is a two-dimensional graphical depiction of Mogul quality analysis of bond lengths, bond angles, torsion angles, and ring geometry for all instances of the Ligand of Interest. In addition, ligands with molecular weight > 250 and outliers as shown on the validation Tables will also be included. For torsion angles, if less than 5% of the Mogul distribution of torsion angles is within 10 degrees of the torsion angle in question, then that torsion angle is considered an outlier. Any bond that is central to one or more torsion angles identified as an outlier by Mogul will be highlighted in the graph. For rings, the root-mean-square deviation (RMSD) between the ring in question and similar rings identified by Mogul is calculated over all ring torsion angles. If the average RMSD is greater than 60 degrees and the minimal RMSD between the ring in question and any Mogul-identified rings is also greater than 60 degrees, then that ring is considered an outlier.

The outliers are highlighted in purple. The color gray indicates Mogul did not find sufficient equivalents in the CSD to analyse the geometry.

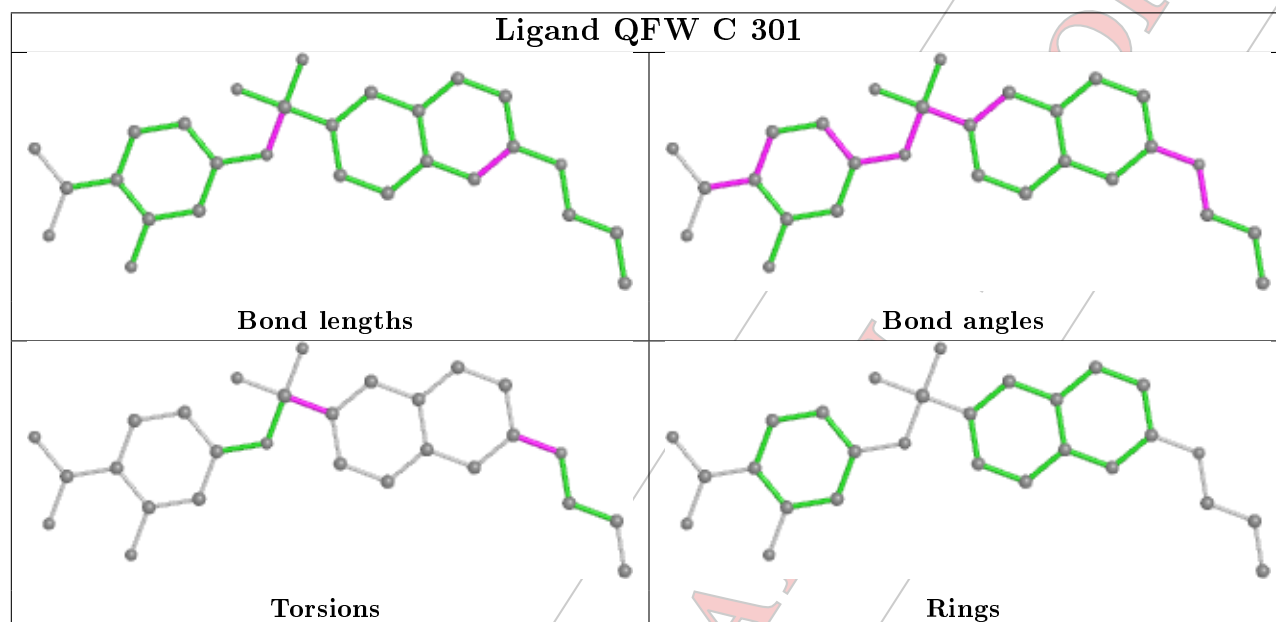

## 5.7 Other polymers [i](#)

There are no such residues in this entry.

## 5.8 Polymer linkage issues [i](#)

The following chains have linkage breaks:

| Mol | Chain | Number of breaks |
|-----|-------|------------------|
| 4   | D     | 2                |

All chain breaks are listed below:

| Model | Chain | Residue-1 | Atom-1 | Residue-2 | Atom-2 | Distance (Å) |
|-------|-------|-----------|--------|-----------|--------|--------------|
| 1     | D     | 13:HIS    | C      | 14:ILE    | N      | 15.51        |
| 1     | D     | 11:GLY    | C      | 12:ALA    | N      | 3.36         |

## 6 Map visualisation [i](#)

This section contains visualisations of the EMDB entry EMD-11165. These are intended to permit visual inspection of the internal detail of the map and identification of artifacts.

### 6.1 Orthogonal projections [i](#)

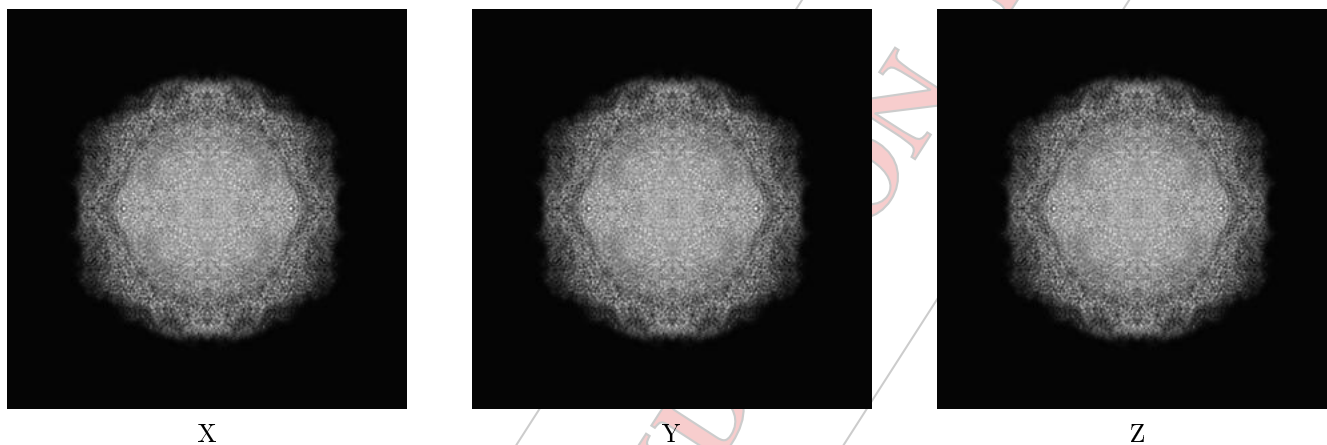

The images above show the map projected in three orthogonal projections, in greyscale.

### 6.2 Central slices [i](#)

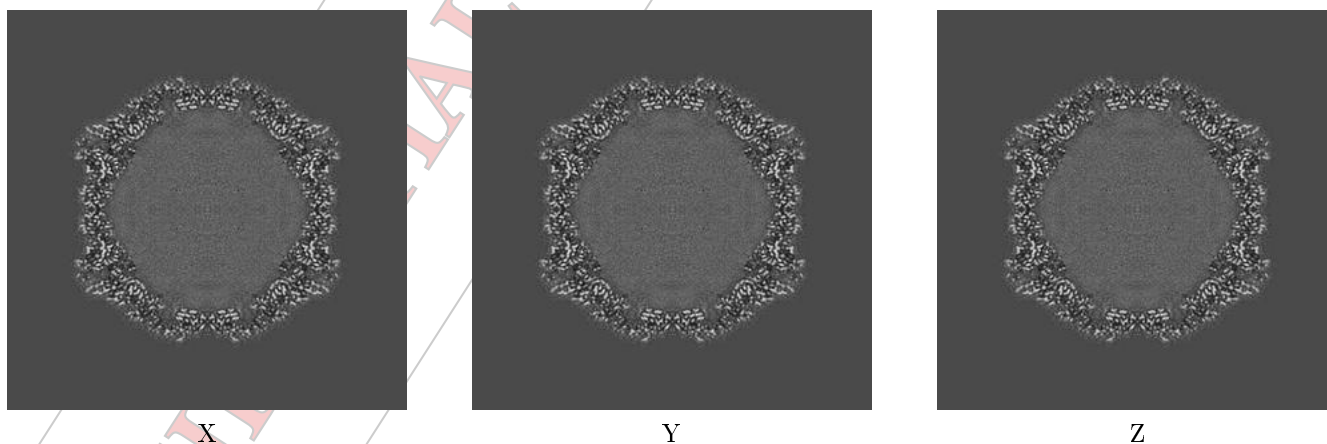

The images above show central slices of the map in three orthogonal directions, in greyscale.

### 6.3 Largest variance slices [i](#)

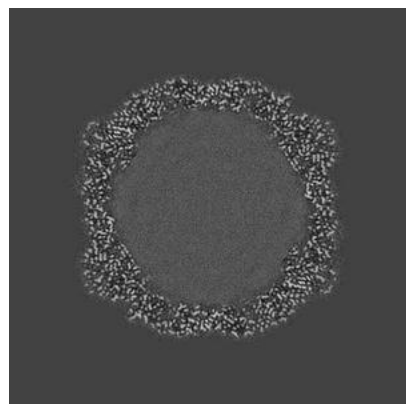

X Index: 203

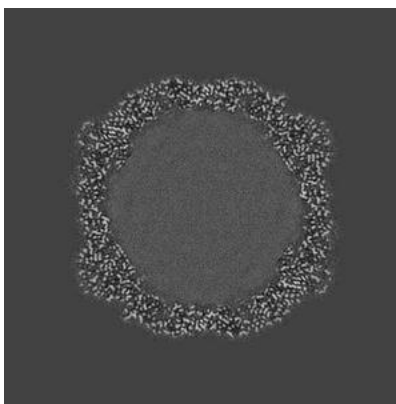

Y Index: 203

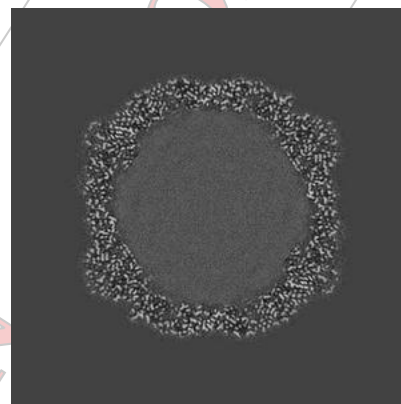

Z Index: 203

The images above show the highest variance slices of the map in three orthogonal directions, in greyscale.

### 6.4 Orthogonal surface views [i](#)

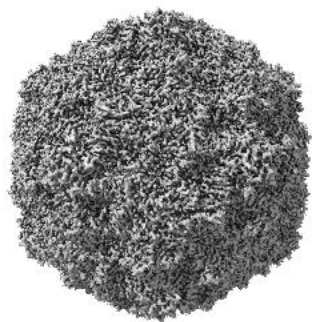

X

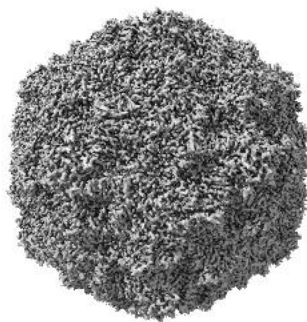

Y

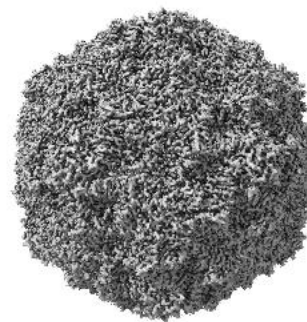

Z

The images above show the 3D surface view of the map at the recommended contour level 0.00928. This in conjunction with the slice images can indicate whether an appropriate contour level has been selected.

### 6.5 Mask visualisation [i](#)

This section was not generated. No masks were provided.

## 7 Map analysis [i](#)

This section contains the results of statistical analysis of the map.

### 7.1 Map-value distribution [i](#)

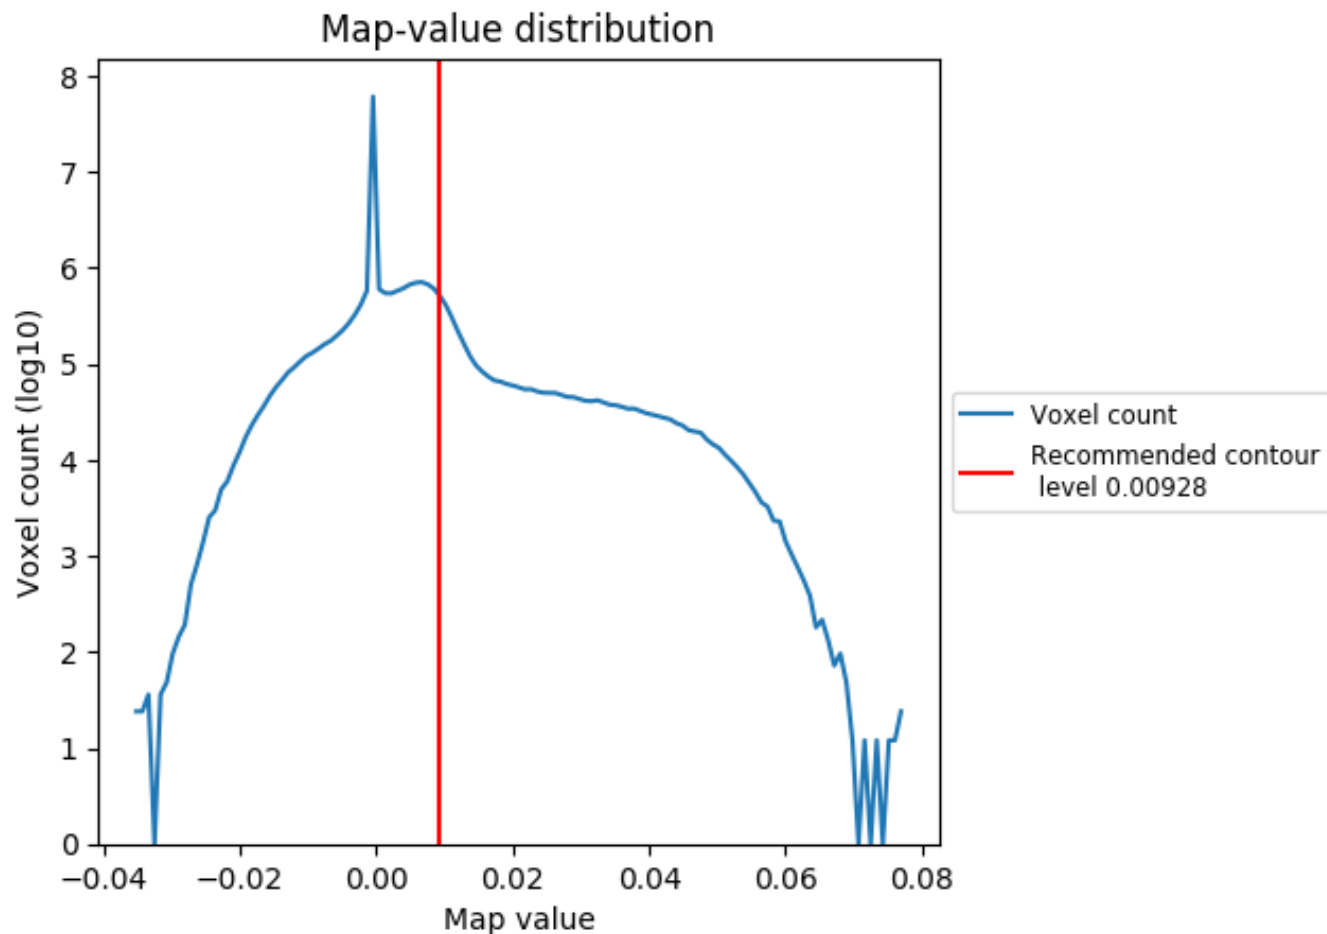

The map-value distribution is plotted in 128 intervals along the x-axis. The y-axis is logarithmic. A spike in this graph at zero usually indicates that the volume has been masked.

## 7.2 Volume estimate [i](#)

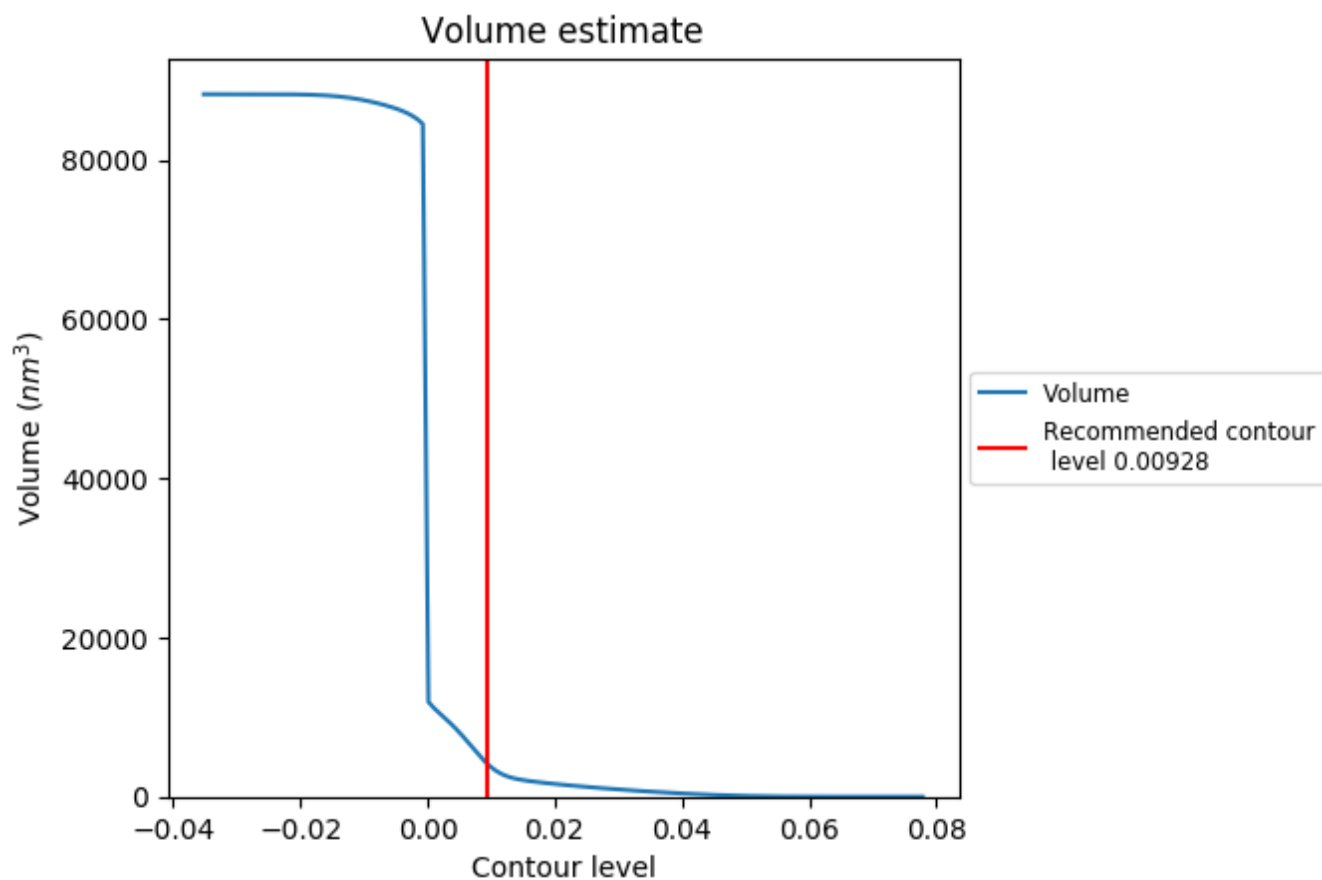

The volume at the recommended contour level is 4235 nm<sup>3</sup>; this corresponds to an approximate mass of 3826 kDa.

The volume estimate graph shows how the enclosed volume varies with the contour level. The recommended contour level is shown as a vertical line and the intersection between the line and the curve gives the volume of the enclosed surface at the given level.

### 7.3 Rotationally averaged power spectrum i

PT

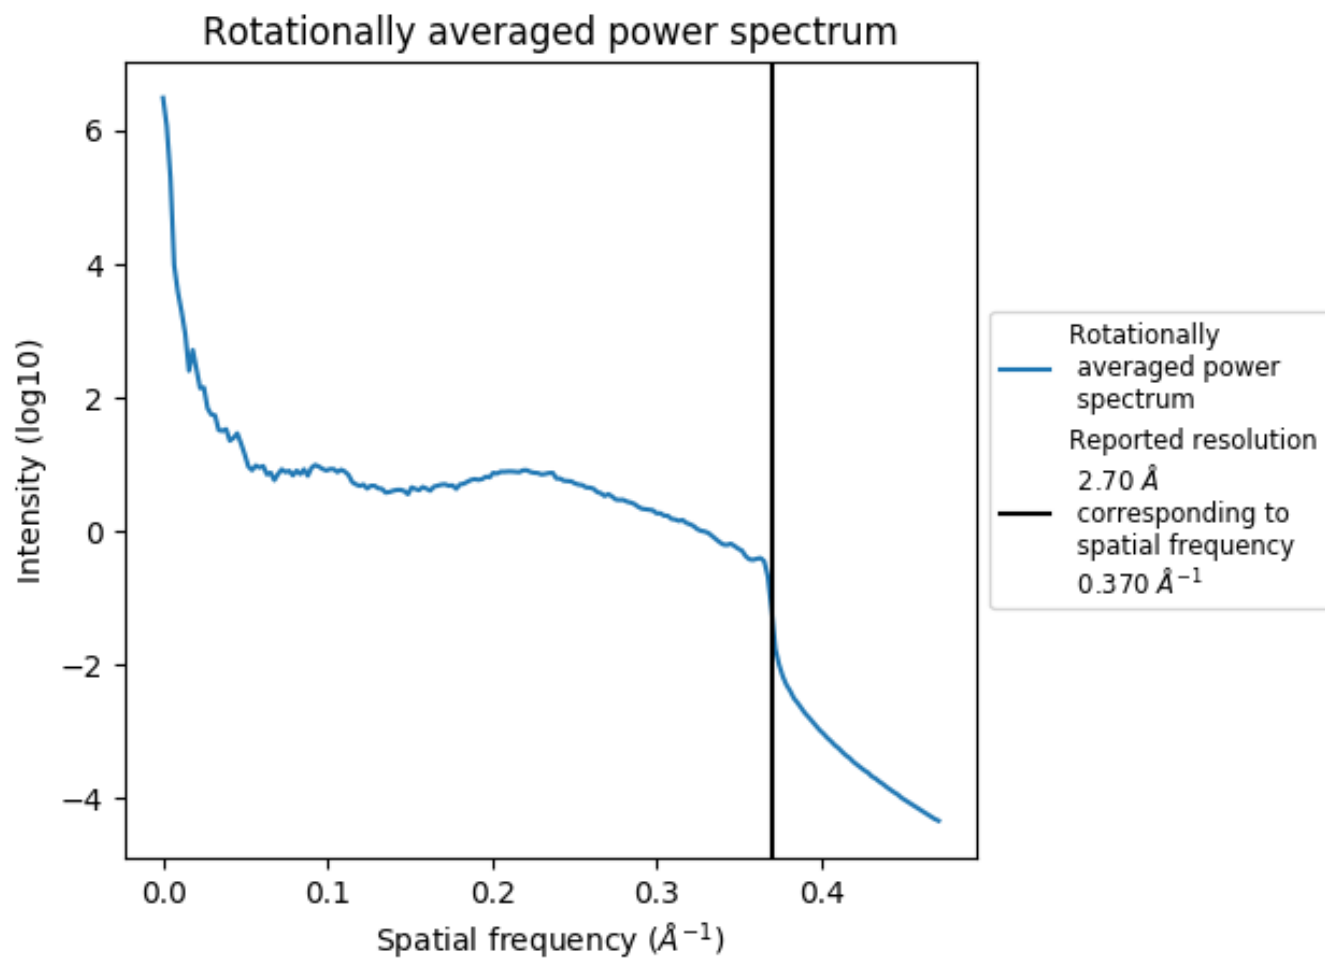

CONFIDENTIAL



## 8 Fourier-Shell correlation [i](#)

This section was not generated. No FSC curve or half maps provided.

**CONFIDENTIAL VALIDATION REPORT**

## 9 Map-model fit [i](#)

This section contains information regarding the fit between EMDB map EMD-11165 and PDB model 6ZCK. Per-residue inclusion information can be found in section 3 on page 6.

### 9.1 Map-model overlay [i](#)

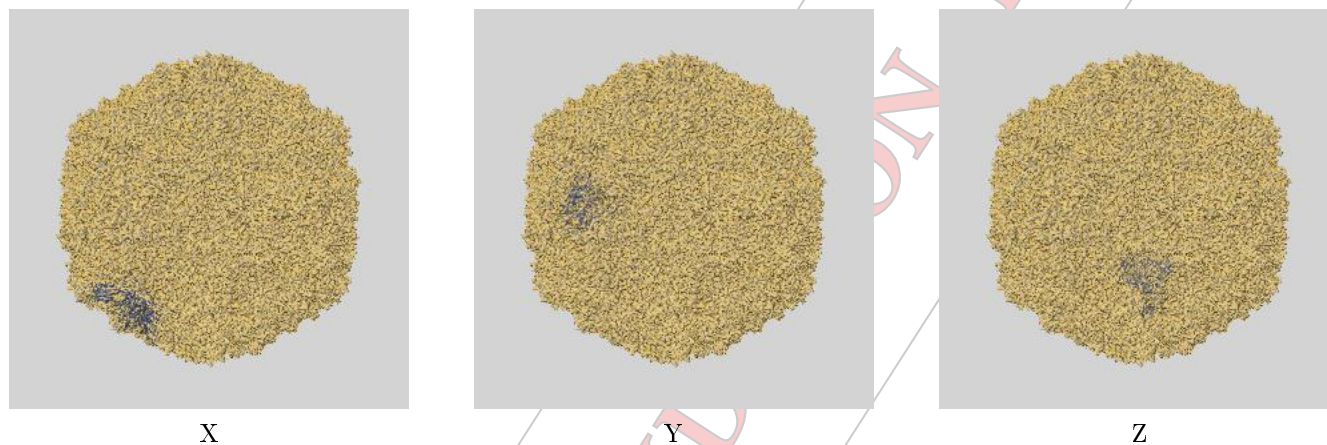

The images above show the 3D surface view of the map at the recommended contour level 0.00928 at 50% transparency in yellow overlaid with a ribbon representation of the model coloured in blue. These images allow for the visual assessment of the quality of fit between the atomic model and the map.

## 9.2 Atom inclusion [i](#)

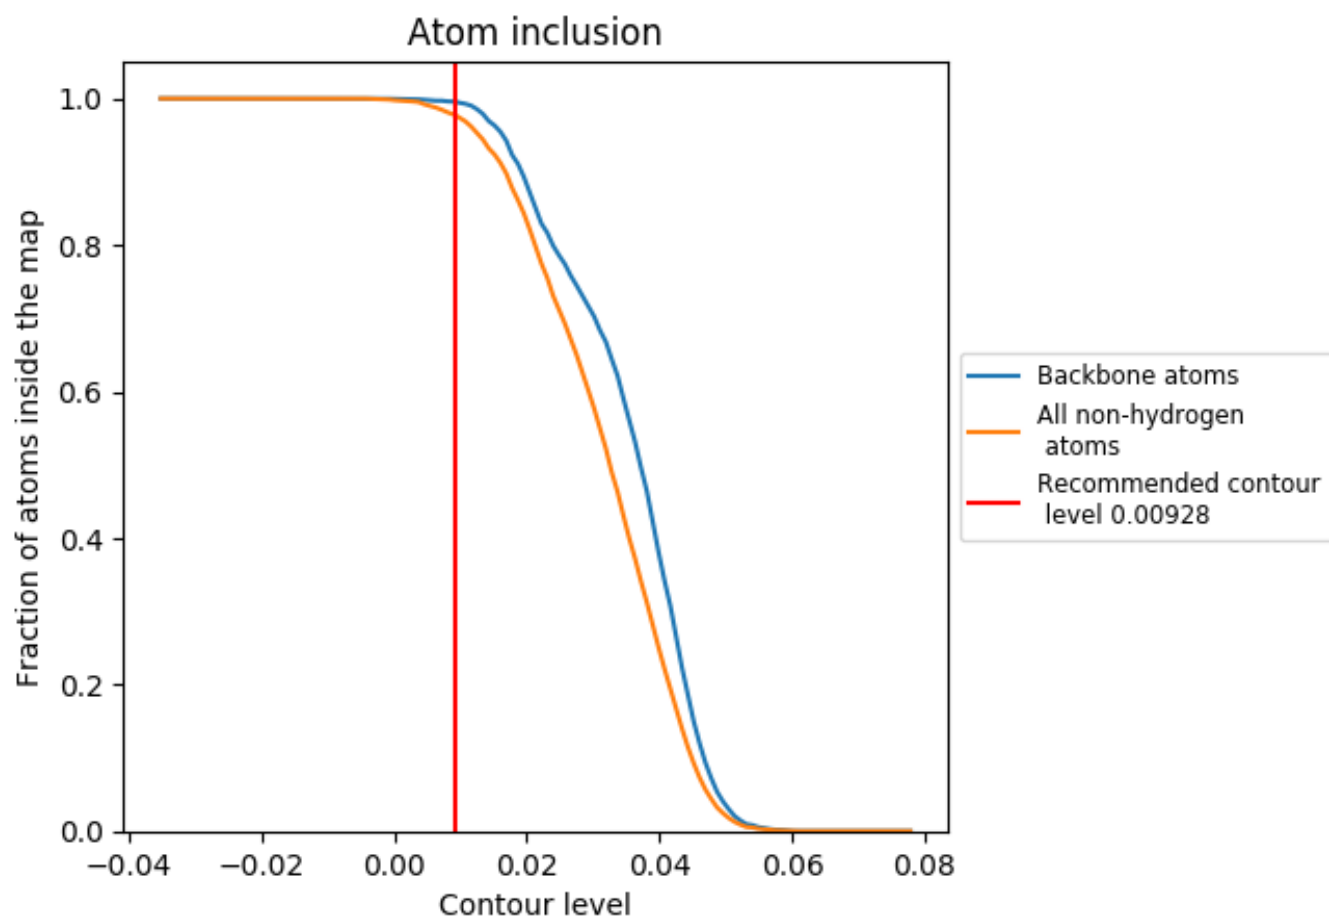

At the recommended contour level, 100% of all backbone atoms, 98% of all non-hydrogen atoms, are inside the map.

CONFIDENTIAL
