# Supplementary material for: Identification of a conserved virion-stabilizing network inside the interprotomer pocket of enteroviruses
Source: PubMed Central journal article supplement (PMC7910612; doi:10.1038/s42003-021-01779-x), 2021-02-26
Supplement: 42003_2021_1779_MOESM3_ESM.pdf [file 42003_2021_1779_MOESM3_ESM.pdf]

## **Description of Additional Supplementary Files**

File Name: Supplementary Data 1

Description: Table of CVB4 infectivity in the presence or absence of CP48 after exposure to increasing temperature.
